# Supplementary material
Source: PubMed Central journal article supplement (PMC3856806)
Supplement: 1319700110_sapp.pdf [file 1319700110_sapp.pdf]

## Supporting Information for:

### RNA-Seq from Single Nuclei

Rashel V. Grindberg<sup>1†</sup>, Joyclyn L. Yee-Greenbaum<sup>1a</sup>, Michael J. McConnell<sup>2a</sup>, Mark Novotny<sup>1</sup>, Andy L. O' Shaughnessy<sup>1‡</sup>, Georgina M. Lambert<sup>3</sup>, Marcos J. Araúzo-Bravo<sup>7</sup>, Jun Lee<sup>6</sup>, Max Fishman<sup>1</sup>, Gillian E. Robbins<sup>1</sup>, Xiaoying Lin<sup>5</sup>, Pratap Venepally<sup>4</sup>, Jonathan H. Badger<sup>1</sup>, David W. Galbraith<sup>3</sup>, Fred H. Gage<sup>2\*</sup>, Roger S. Lasken<sup>1\*</sup>

<sup>1</sup>*J. Craig Venter Institute, 10355 Science Center Drive, San Diego, CA 92121, USA*

<sup>2</sup>*Salk Institute for Biological Studies, 10010 N. Torrey Pines Road, La Jolla, CA 92037-1002, USA*

<sup>3</sup>*School of Plant Sciences and BIO5 Institute, University of Arizona, 1140 E. South Campus Drive, Tucson, AZ 85721-0036, USA*

<sup>4</sup>*J. Craig Venter Institute, 9704 Medical Center Drive, Rockville, MD 20850, USA*

<sup>5‡</sup>*Applied Biosystems, part of Life Technologies, 850 Lincoln Centre Drive, Foster City, CA 94404, USA*

<sup>6</sup>*LeGene Biosciences, 7929 Silverton Avenue, Suite 601, San Diego, CA 92126*

<sup>7†</sup>*Department of Cell and Developmental Biology, Max Planck Institute for Molecular Biomedicine, Röntgenstrasse 20, 48149 Münster, NRW, Germany*

<sup>a</sup>Equal contributions

<sup>‡†</sup>Current affiliations

\*Corresponding authors: Roger S. Lasken (Email: [rlasken@jcvj.org](mailto:rlasken@jcvj.org)) and Fred H. Gage (Email: [gage@salk.edu](mailto:gage@salk.edu))

#### **This PDF file includes:**

**Supporting Information Figures S1-S16**

**Supporting Information Tables S1-S6**

**Supporting Information Methods S1-S5**

## Figures

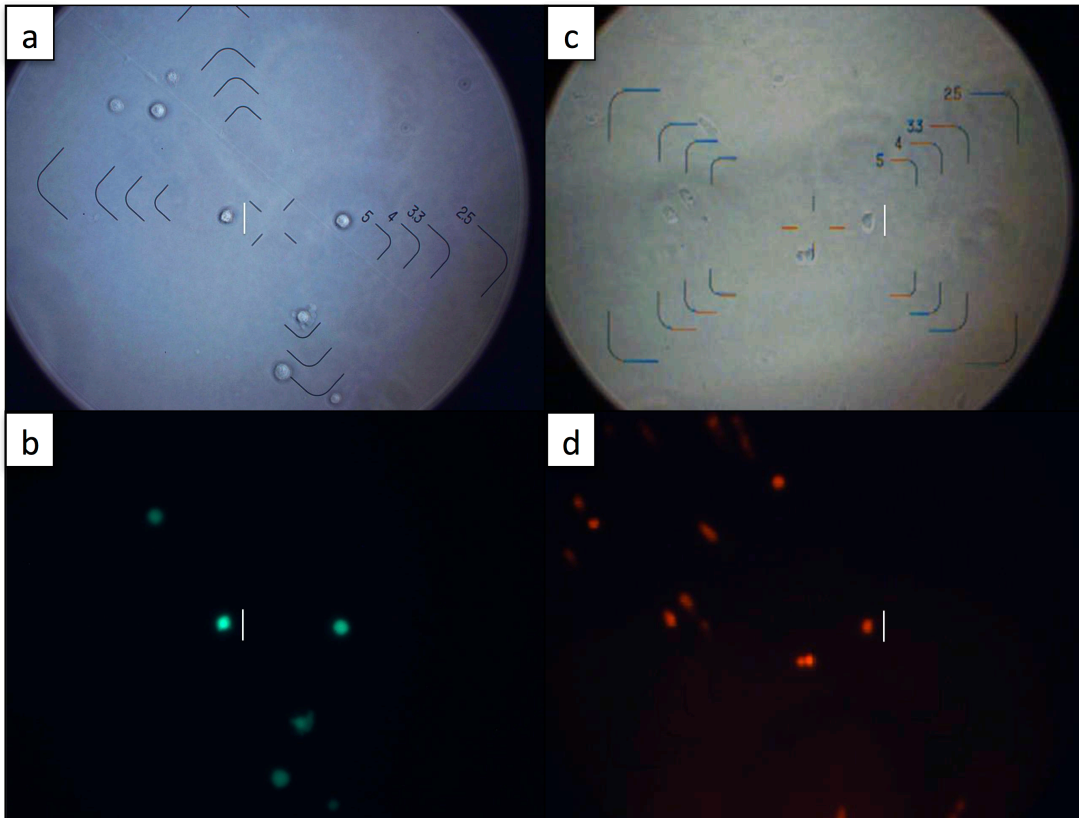

**Figure S1. Evaluation of FACS sorted single cells and single nuclei using fluorescence microscopy.** Single cells and nuclei were sorted onto a slide containing 100  $\mu\text{l}$  of 1X PBS. Imaging was done by phase contrast microscopy (a,c) and epifluorescence microscopy (b,d). **(a,b):** Sorted NPC cells (400X). **(c,d):** Sorted NPC nuclei (600X), stained with propidium iodide (d) (600X). White line is a 25  $\mu\text{m}$  calibration ruler.

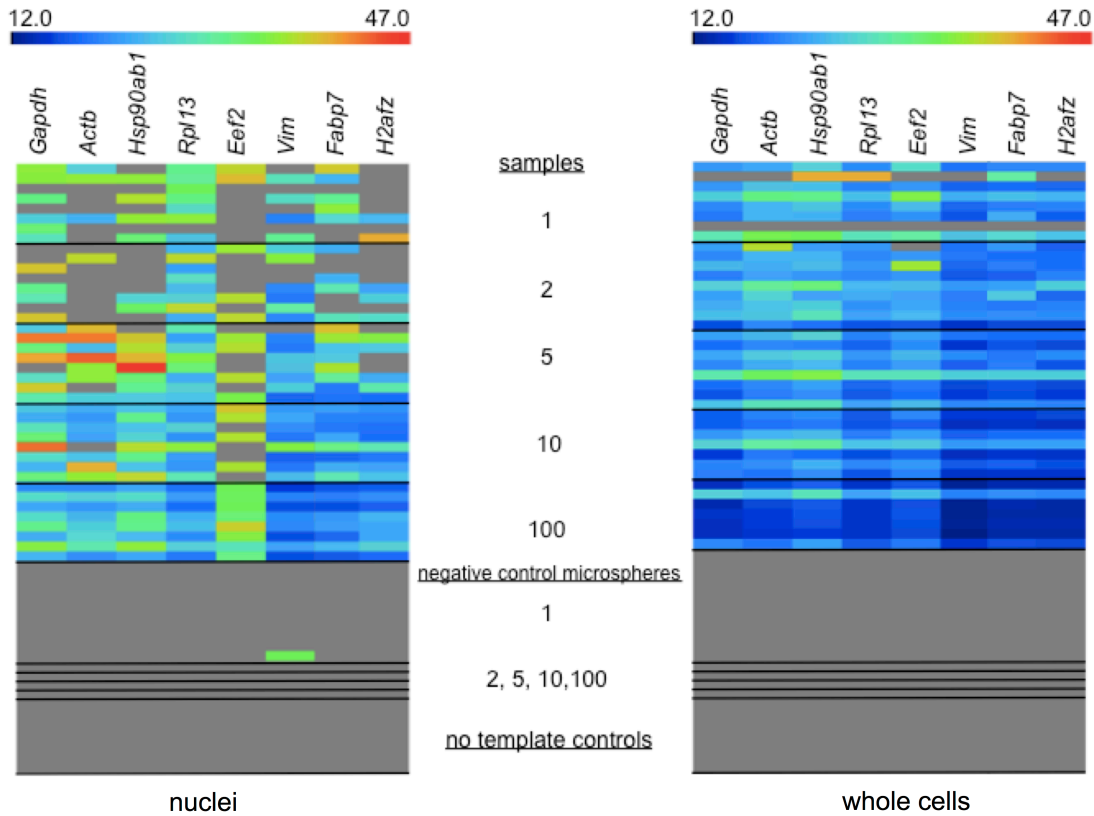

**Figure S2. Heat map of TaqMan Ct values for the sorted NPC-EYFP nuclei and whole cells.** Samples were FACS sorted corresponding to (1, 2, 5, 10, 100 cells or nuclei), sorted negative microspheres of NPC-YFP whole cells and nuclei (1, 2, 5, 10, 100 beads), and non-template controls (NTC). The heat map scale ranges from 12 to 47 Ct (representing high to low expression). Gray sections in the heat map indicate no Ct detection. Eight replicates were tested for single cells or nuclei and only one sample was tested for the 2, 5, 10 and 100 cells or nuclei. A single positive event obtained from one control microsphere sort was associated with a Ct value of 39, which is a marginal value for reliable detection, and about 13 cycles later than Ct values obtained when a single cell or nucleus was sorted.

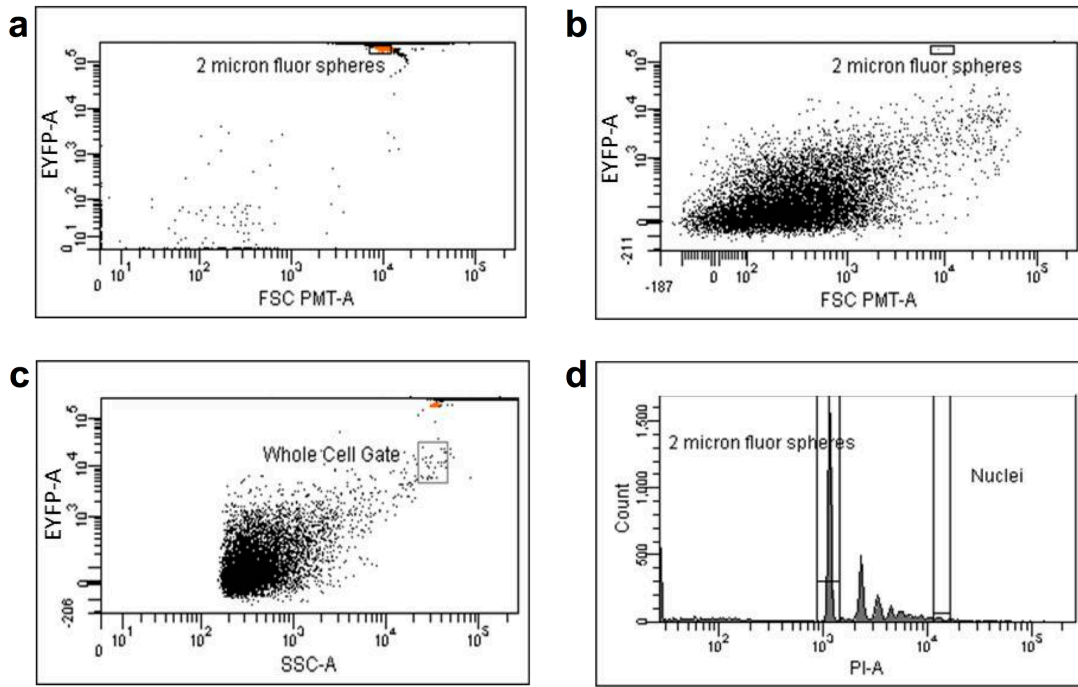

**Figure S3. Absence of contaminating transcripts transmitted through flow sorting.** FACS was employed to recover 2  $\mu\text{m}$  fluorescent microspheres spiked into the NPC whole cells and the nuclear preparations. Biparametric flow analysis of (a): a diluted sample of the fluorescent microspheres (b): whole cells (c): whole cells containing spiked microspheres and (d): PI-stained nuclei containing spiked microspheres. The gate employed for sorting the microspheres (box) does not overlap the positions of the whole cells or the nuclei. Ten replicates were tested for single negative microspheres of cells or nuclei and only one sample was tested for the 2, 5, 10 and 100 cells or nuclei.

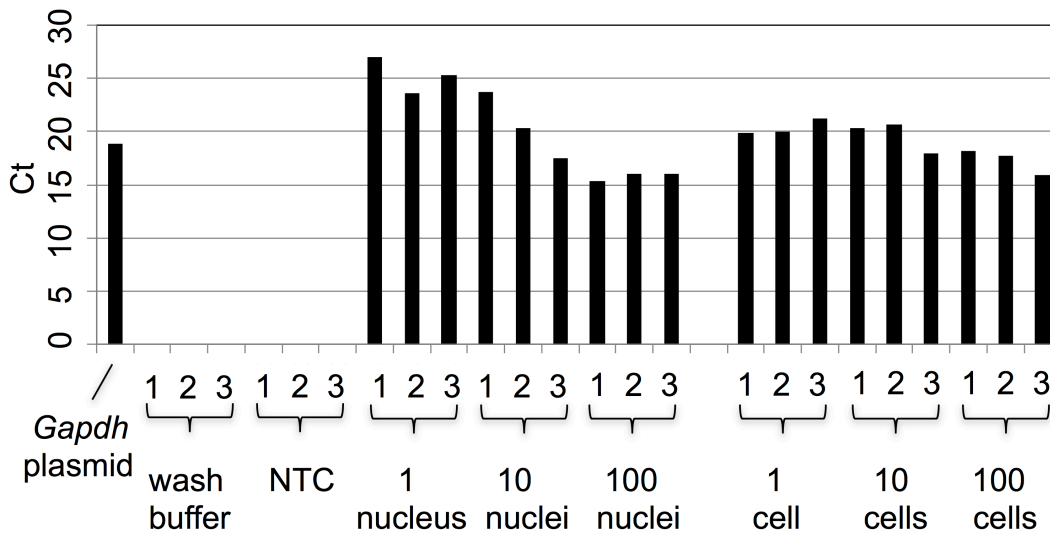

**Figure S4. Confirmation of cDNA synthesis by qPCR.** qPCR was employed to detect *Gapdh* transcripts within cDNA derived from biological triplicates of 1, 10 and 100 nuclei and cells. A linearized plasmid containing the *Gapdh* sequence was used as positive control. Triplicate wash buffer and triplicate qPCR no template controls (NTCs) lacked signals.

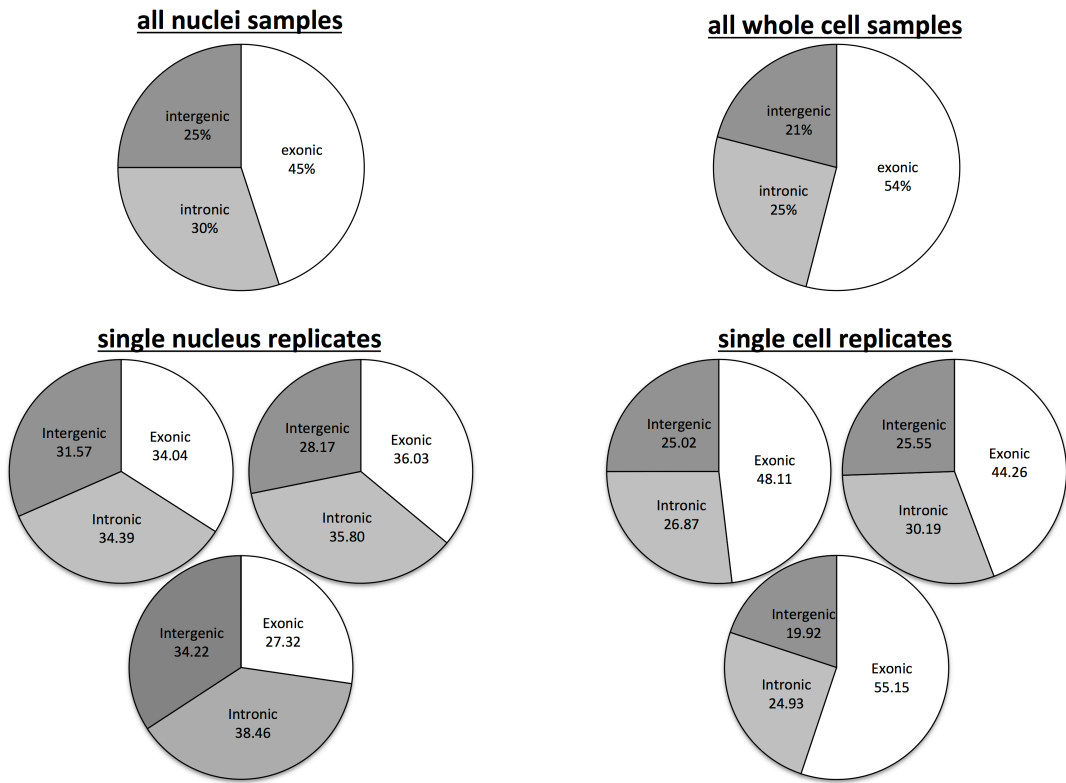

**Figure S5. Unique sequencing read distributions for single cell and single nuclei replicates.** All unique reads that map to the genome were counted and divided into three categories showing that the single nucleus samples have more intronic and intergenic reads than in the single cells (on average 16.7% more). A read was labeled as intronic if it mapped completely within an intron, as exonic if it was completely contained within an exon (as defined by the reference genome) and intergenic if it did not overlap a gene. All reads mapping to 5'- and 3'- untranslated regions were categorized as exonic.

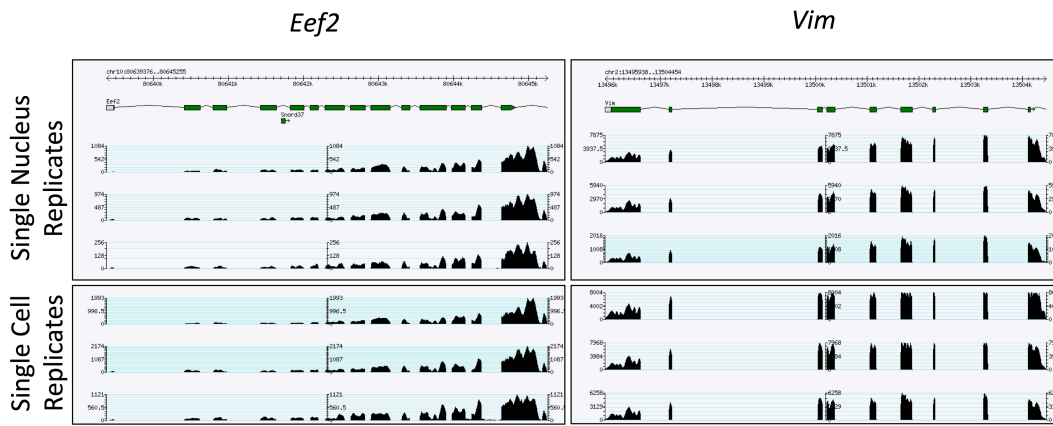

**Figure S6. Exon-specific plot coverage of exemplar genes.** The housekeeping gene *eukaryotic translation elongation factor 2* (*Eef2*) and the neural progenitor cell-specific gene *Vimentin* (*Vim*) are illustrated. Reads map to exons and not to introns, indicating accurate mapping of processed transcripts from single nuclei.

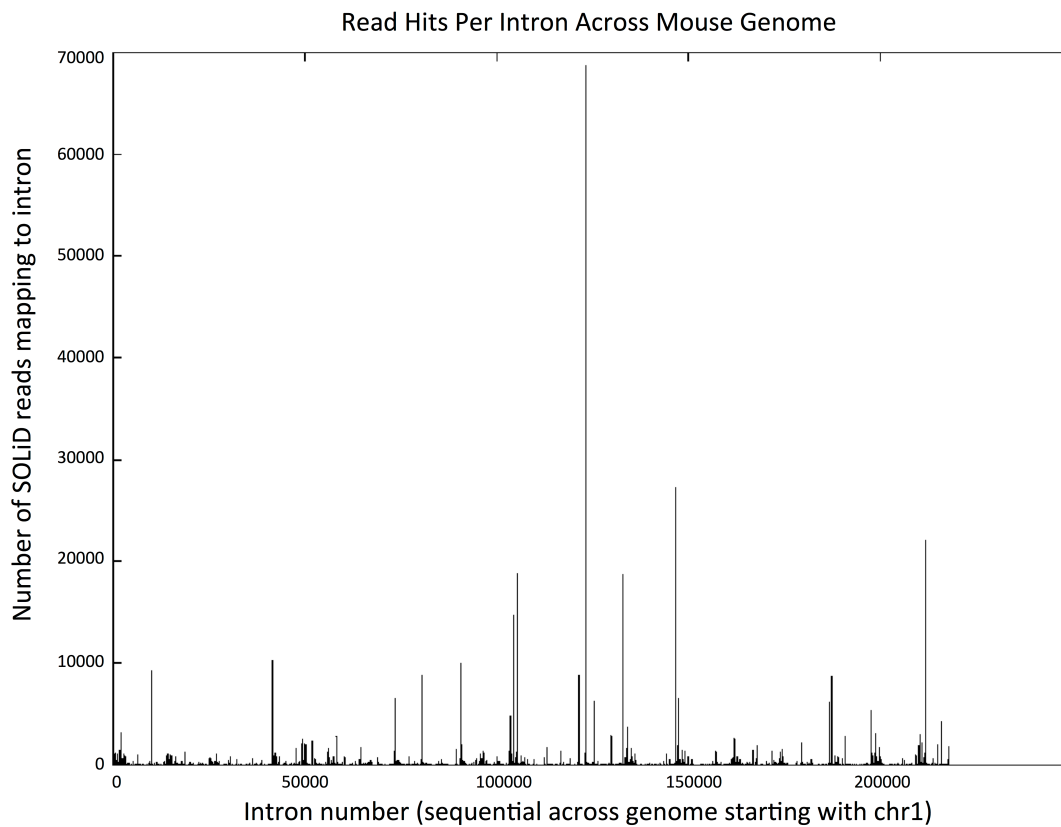

**Figure S7. Intronic artifact reads are minimal and can be identified bioinformatically.** Reads to annotated introns from the mouse genome (build mm9) are plotted against location of the chromosome. In this example, the 687,233 reads mapped to a single intron near a polyTC enriched island of 28 nucleotides in length (TTTGTCTTTCTCCTCTCCTCTCCTCTCC), indicating a mapping artifact. Based on all intronic reads, 95% of the introns have less than 200 reads (on average 82 reads per intron). Therefore, intronic reads arising from mapping artifacts can be identified and removed bioinformatically.



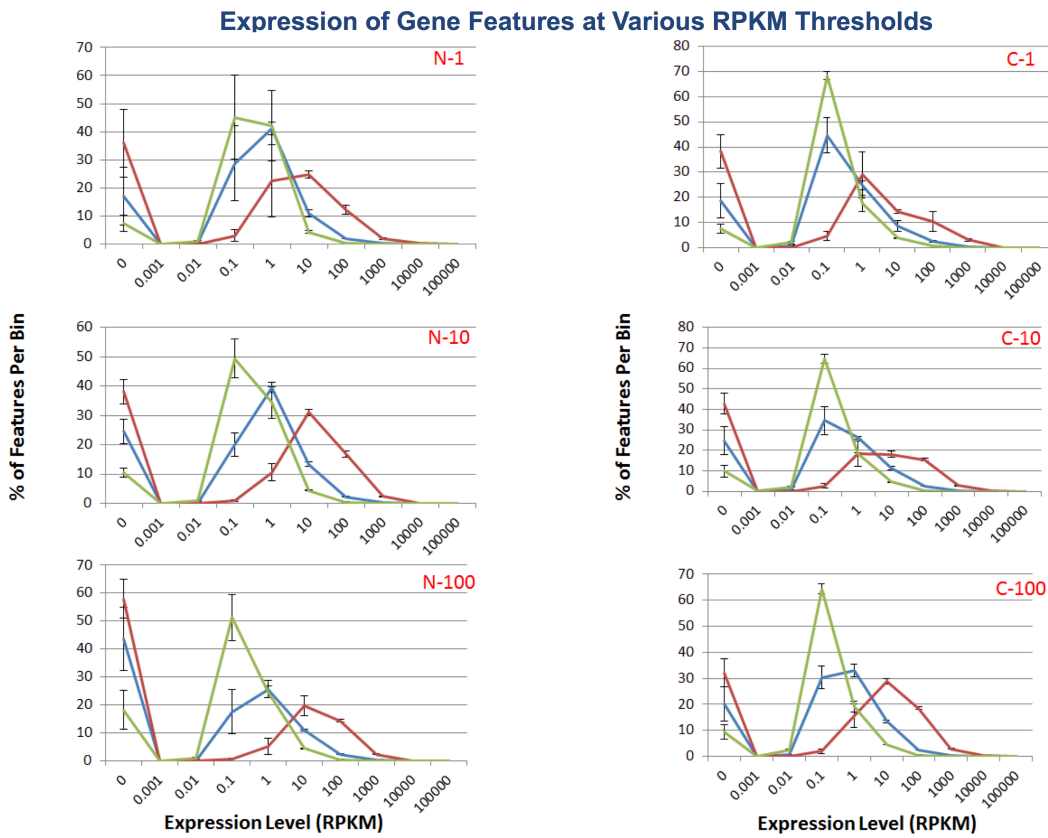

**Figure S8. Expression of gene features at various RPKM thresholds.** The annotated exons and introns of the transcripts and the intergenic regions from the mouse genome (build mm9) are plotted against the expression levels, over an interval starting at RPKM of 0 and ending at 100,000. Intron and intergenic reads have a peak RPKM of 0.10 (blue and green lines), which differs from exons detected at higher RPKM values (peak RPKM of 10). The intergenic regions can serve as controls for background mapping signal. Nearly all mapped exons have an RPKM value between 0.1 and 1000 confirming a dynamic range of 4 logs and a sensitivity approaching a single transcript per cell. N-1, N-10, and N-100 refer to 1, 10 and 100 nuclei respectively and C-1, C-10, and C-100 refers to 1, 10 and 100 cells respectively.

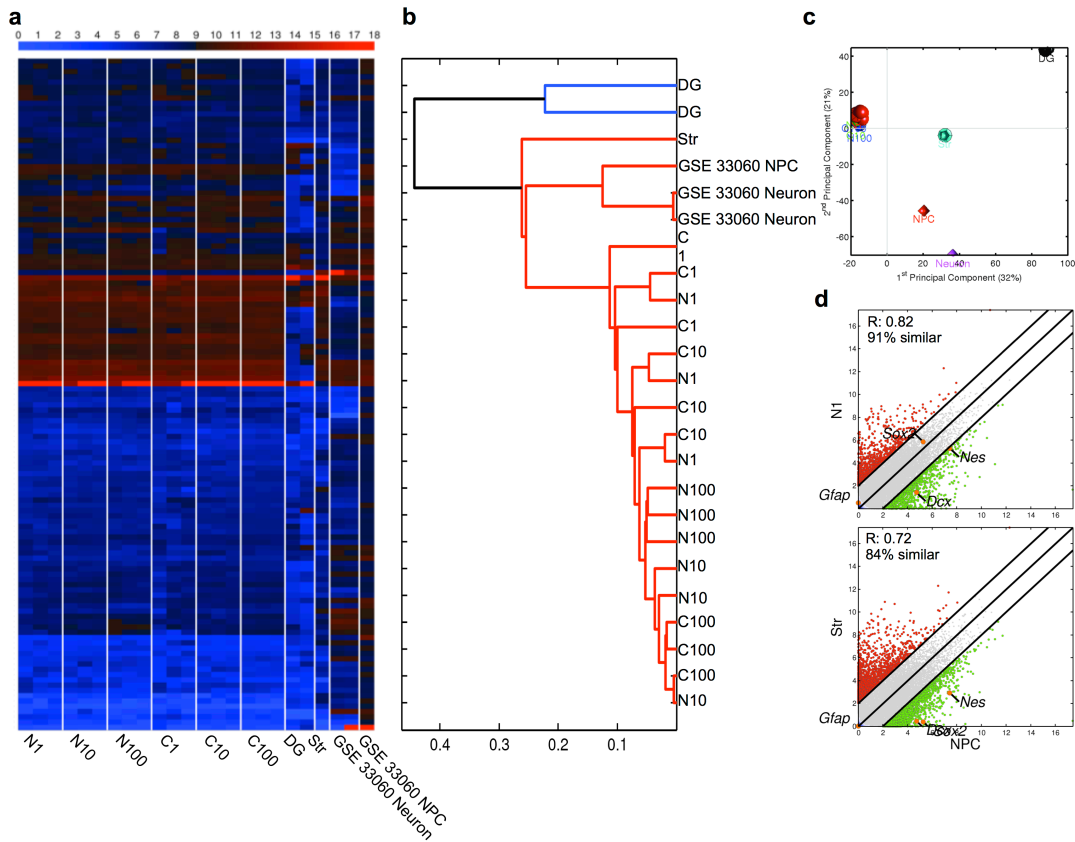

**Figure S9. External confirmation of cell-type specific sequencing of NPC nuclei.** Comparison of single nuclei and cell samples to external RNA-Seq comparators (GSE33060 from (1), GSM818956 (NPC), GSM818951 (Neuron biological replicate 1) and GSM818952 (Neuron biological replicate 2)). (a) heat map of highly expressed genes, (b) hierarchical clustering, (c) principal component (PCA) and (d) pairwise scatter plot analysis determines that NPC single nuclei and cells are more similar to the external NPCs than to DG and Str controls.  $\log_2$  transformation and quantile normalization of all samples was performed. Due to the differences in technical preparation between data sets, we do not expect 100% correlation of all NPC samples. However, these technical differences do not account for all of the differences as the DG (prepared as for NPC single nuclei) cluster further away from single NPCs than the GSE33060 data set.

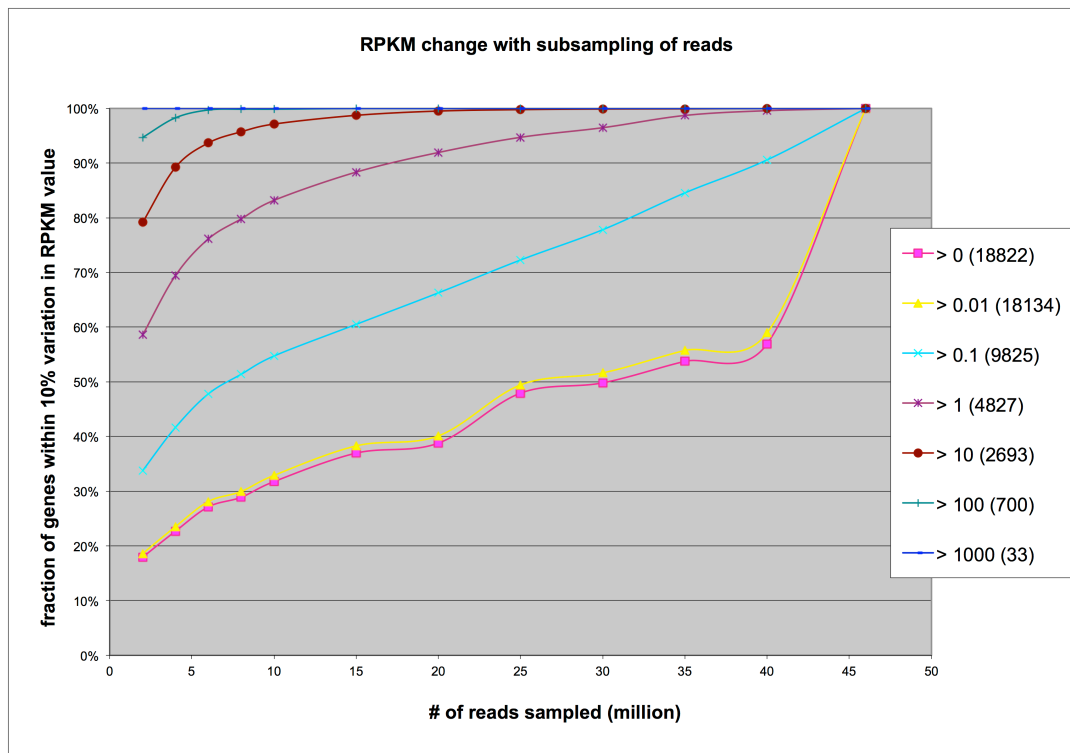

**Figure S10. Transcripts with 5 or more copies are successfully interrogated.** The ordinate is a term reflecting the variation of RPKM relative to the total reads. As the number of reads approaches 46 million (abscissa), the different RPKM bins (see colored lines and key) are saturated at 100% indicating that sequencing to a greater depth will not improve the confidence level. Genes with RPKM of 1 or greater (or about 5 transcripts per cell) are well addressable in this cell type under the probed conditions.

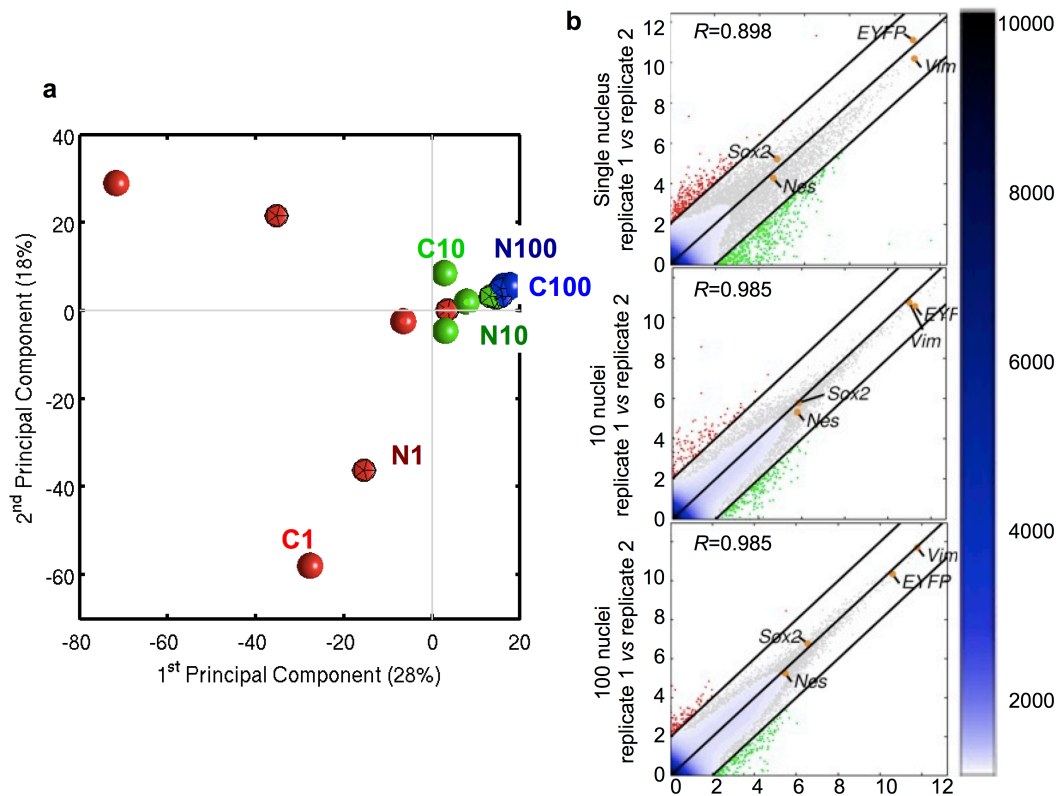

**Figure S11. Single sample biological replicates display more variability than pooled replicates.**  
**(a):** Principal Component Analysis (PCA). The first principal component (PC1) captures 21% of the gene expression variability and the second principal component (PC2) captures 16% of the variability. Together these principal components account for 37% of the gene expression variability in all samples and all replicates. Symbols: The N1 (single nucleus) populations are depicted by red icosahedra, N10 (10 nuclei) by green icosahedra, the N100 (100 nuclei) by blue icosahedra, the C1 (1 cell) by red spheres, the C10 (10 cells) by green spheres and the C100 (100 cells) by blue spheres.  
**(b):** Pairwise scatter plots of biological replicates within a group. The replicates represented here are a single nucleus, ten nuclei and one hundred nuclei (see Supplementary Fig. 12a and b for comparisons of all samples). Every point in a pairwise scatter plot represents the gene expression level (RPKM) of a transcript in two samples. The horizontal projection corresponds to the expression level in the first sample and the vertical projection corresponds with the expression level in the second sample. The more similar two samples are, the more points in the scatter plots group near the diagonal. Lines parallel to the diagonal indicate a 2-fold difference in expression. A  $\log_2$  scale was used and the Fisher's correlation coefficient ( $R$ ) was calculated with respect to the total number of transcripts (21,611) in the dataset.

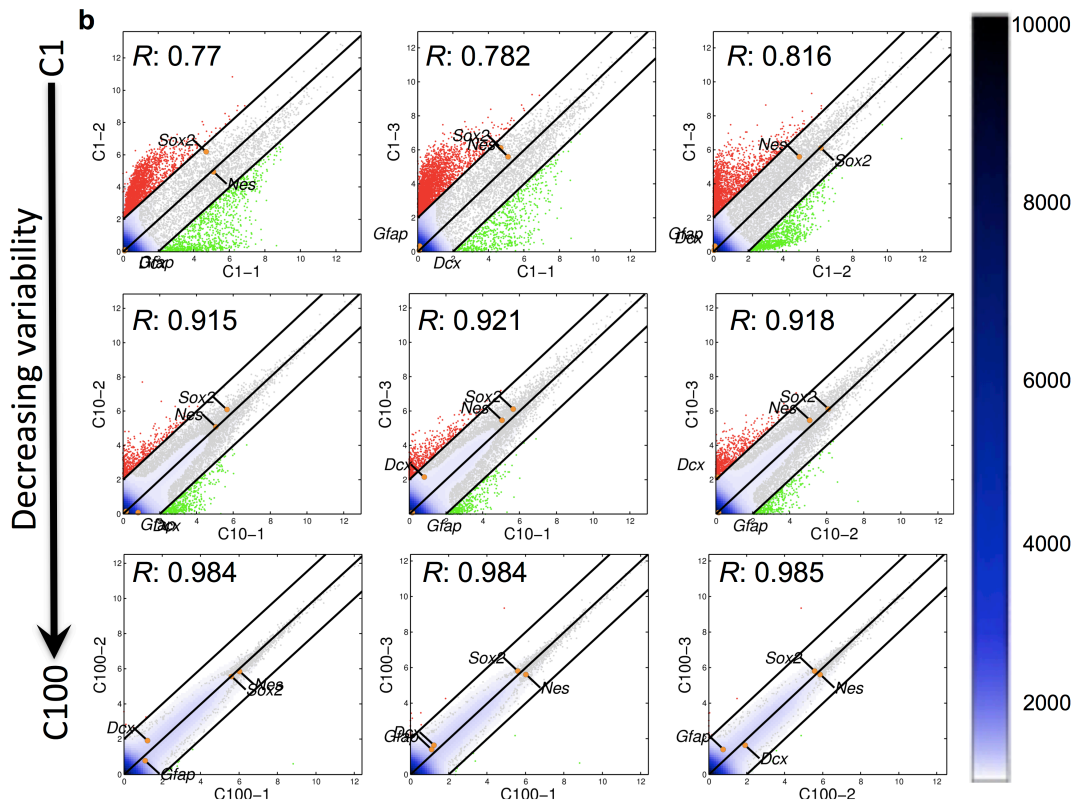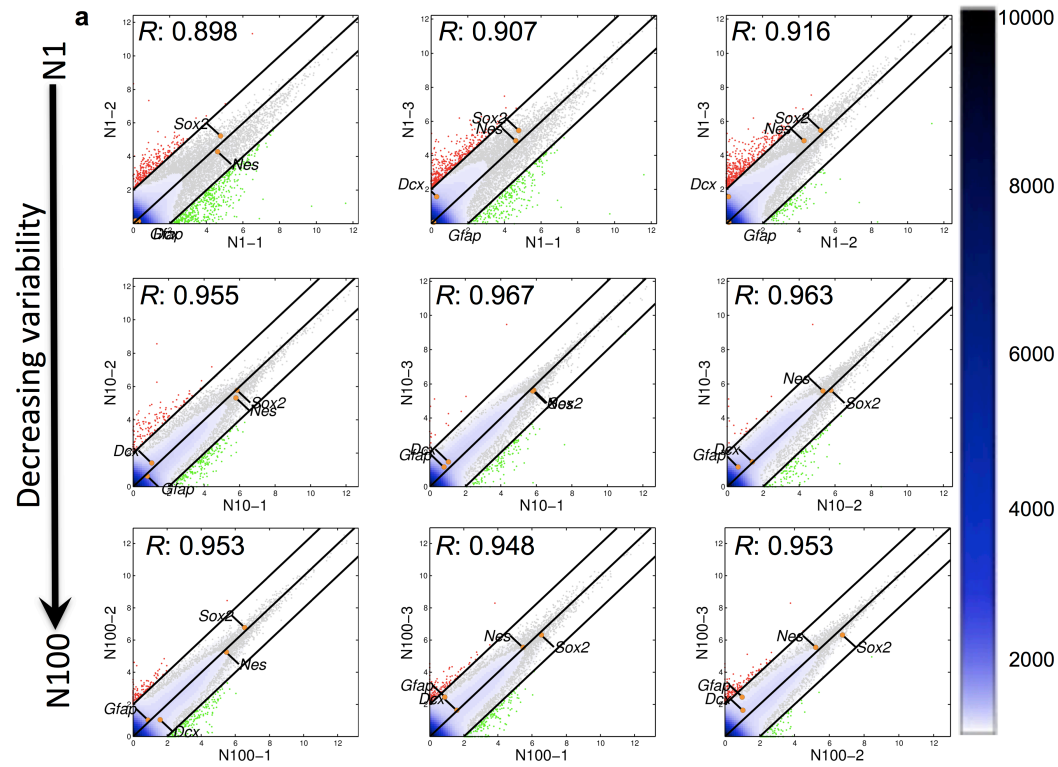

**Figure S12. A decrease in variability is associated with sample pooling, as indicated by pairwise scatterplots of biological triplicates within a group.** The replicates used to perform the pairwise scatter plots were: **(a):** N1-1 through -3, N10-1 through -3, N100-1 through -3, **(b):** C1-1 through -3, C10-1 through -3, C100-1 through -3. These are some (18) pairwise scatter plot comparisons within 6 sample sizes (N-1, N-10, N-100, C-1, C-10 and C-100). Every point in a pairwise scatter plot represents the gene expression level of a transcript in two samples. The horizontal projection corresponds to the expression level in the first sample and the vertical projection corresponds with the expression level in the second sample. The more similar two samples are, the more points in the scatter plots group near the diagonal. Lines parallel to the diagonal indicate a 2-fold difference in expression. A  $\log_2$  scale was used and the Fisher's correlation coefficient ( $R$ ) was calculated with respect to the total number of transcripts (21,611) in the dataset.

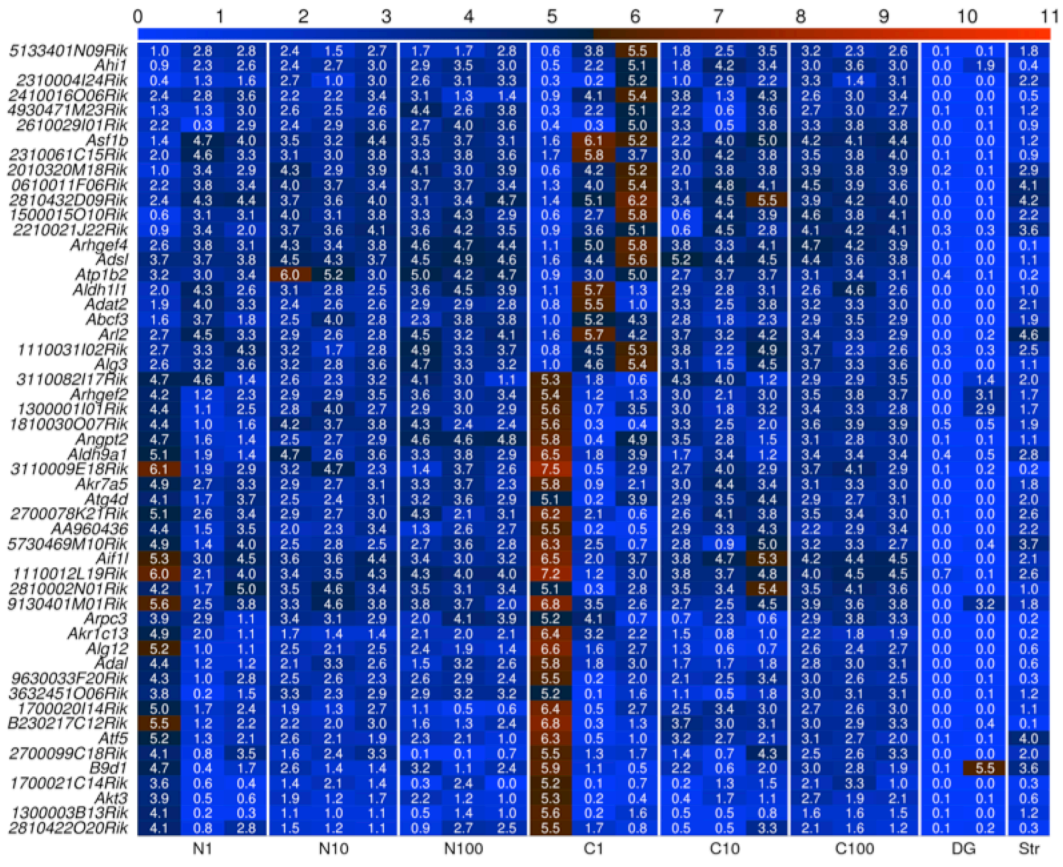

**Figure S13. Heat map of transcripts that are highly variable among the single cells and single nuclei.** Variability decreases with pooled samples. The color bar codifies the gene expression in log<sub>2</sub> scale. The highly expressed genes are red.

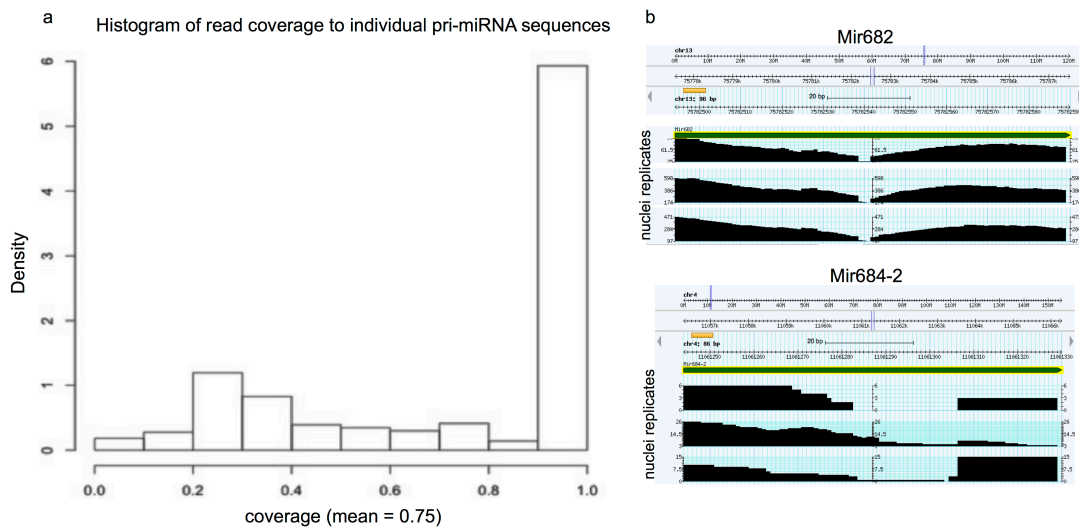

**Figure S14. Coverage of pri-miRNA.** Deep coverage of the 5' end of pri-miRNA demonstrates full-length cDNA synthesis (arrow). The lower coverage in the central hairpin region of the pri-miRNA is presumably an artifact of cDNA synthesis, as the polymerase pauses entering the central hairpin structure from both polarities, as it copies the first strand and then the second strand cDNA. However, we cannot formally disprove that some of the 5' reads were derived from clipped species via terminal transferase poly-A tailing enabling second strand synthesis. Possibly, if clipped species are stable, they have novel functions. They could also contribute to the analysis of processing mechanisms and rates.



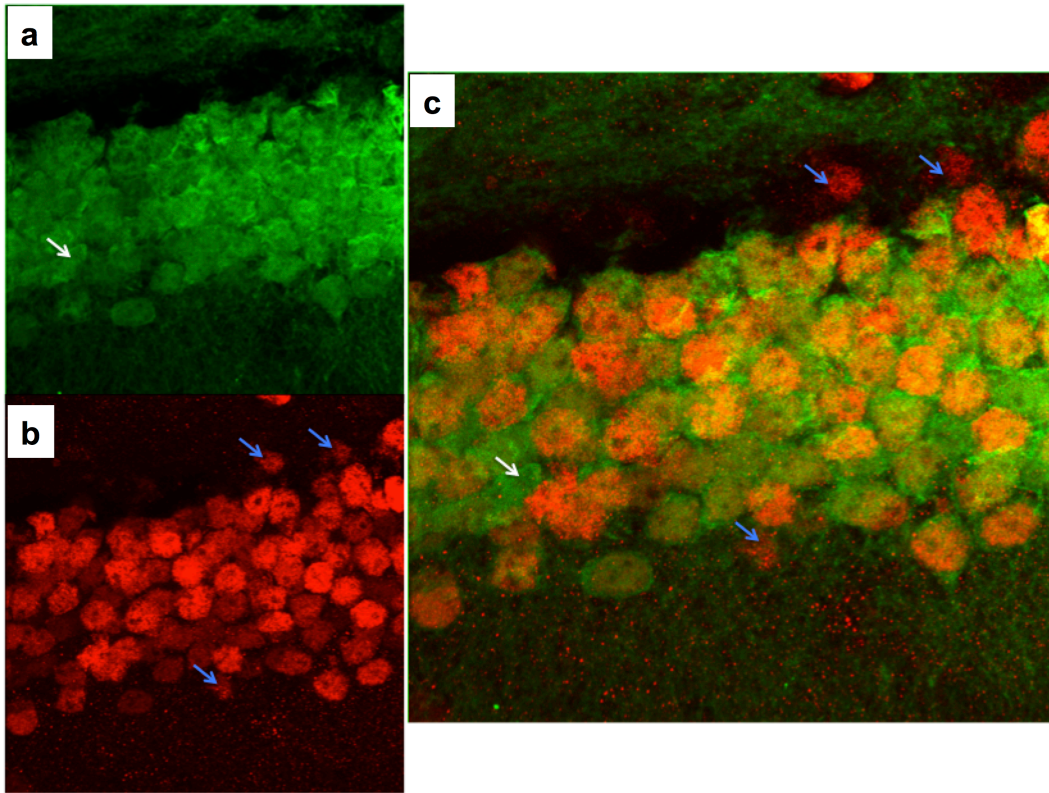

**Figure S15. GFP fluorescence and Prox1 antibody co-localize in dentate gyrus cells.** Dentate gyrus tissue from a transgenic mouse expressing GFP under the *Prox1* promoter (**a**) enables the observation of endogenous Prox1 protein expression (**b**) *in vivo*, (**c**): merged. Images are displayed as a 60x z-stack projection.

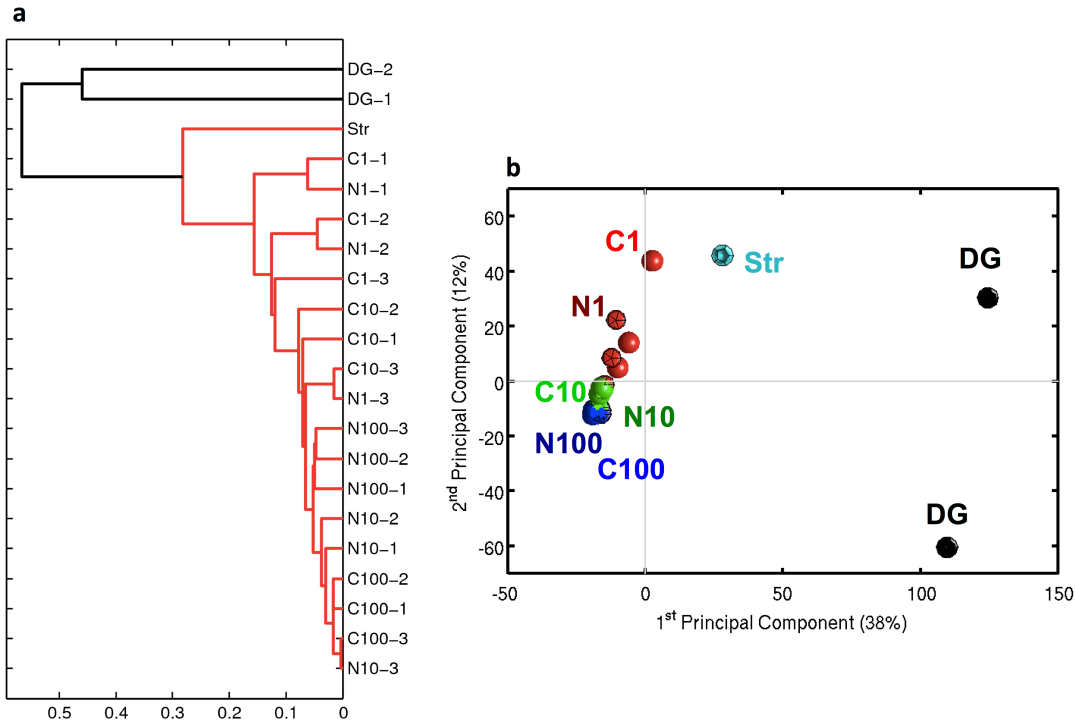

**Figure S16. Identification of cell types through clustering. (a):** Hierarchical clustering indicates that replicates with 10 or more cells or nuclei tend to cluster, whereas single cells and nuclei do not. This implies local variation in transcriptional profiles within single cells and nuclei. Clustering of samples was performed using the correlation metric and the average linkage method. Shorter horizontal links connecting two branches indicate closer similarities between the populations. **(b):** PCA analysis of all samples. The first principal component (PC1) captures 38% of the gene expression variability, and the second principal component (PC2) captures 12% of the variability. The first principal separates between N1, N10, N100, C1, C10, C100 samples (negative coordinates) and **dentate gyrus (DG)**, **stromal (Str)** samples (positive coordinates). The second principal separates between N10, N100, C10, C100, DG samples (negative coordinates) and N1, C1, Str samples (positive coordinates). Symbols: The N1 populations are depicted by red icosahedra, the N10 by green icosahedra, the N100 by blue icosahedra, the C1 by red spheres, the C10 by green spheres, the C100 by blue spheres, the DG by black dodecahedra, and the Str by cyan dodecahedra.

**Tables**

**Table S1.** Absence of contaminating transcripts from FACS sorted spike-in microsphere controls in whole cell and nuclei samples, based on qPCR.

|                                         | 1  | 1  | 1  | 1  | 1  | 1  | 1    | 1  | 2  | 5  | 10 | 100 |
|-----------------------------------------|----|----|----|----|----|----|------|----|----|----|----|-----|
| Ct Values - Nuclei-Microsphere Controls |    |    |    |    |    |    |      |    |    |    |    |     |
| ActB                                    | ND   | ND | ND | ND | ND | ND  |
| Hsp90ab                                 | ND   | ND | ND | ND | ND | ND  |
| Eef2                                    | ND   | ND | ND | ND | ND | ND  |
| Rpl13                                   | ND   | ND | ND | ND | ND | ND  |
| Vim                                     | ND | ND | ND | ND | ND | ND | 38.1 | ND | ND | ND | ND | ND  |
| Fabp7                                   | ND   | ND | ND | ND | ND | ND  |
| H2afz                                   | ND   | ND | ND | ND | ND | ND  |
| GAPDH                                   | ND   | ND | ND | ND | ND | ND  |

  

|                                             | 1  | 1  | 1  | 1  | 1  | 1  | 1  | 1  | 2  | 5  | 10 | 100 |
|---------------------------------------------|----|----|----|----|----|----|----|----|----|----|----|-----|
| Ct values - Whole Cell-Microsphere Controls |    |    |    |    |    |    |    |    |    |    |    |     |
| ActB                                        | ND  |
| Hsp90ab                                     | ND  |
| Eef2                                        | ND  |
| Rpl13                                       | ND  |
| Vim                                         | ND  |
| Fabp7                                       | ND  |
| H2afz                                       | ND  |
| GAPDH                                       | ND  |

**Table S2.** Sequencing read distribution of each sample.

|               | <b>Total</b> | <b>Mapped</b> | <b>%</b> | <b>Not mapped</b> | <b>%</b> | <b>Filtered</b> | <b>%</b> |
|---------------|--------------|---------------|----------|-------------------|----------|-----------------|----------|
| NPC cells     |              |               |          |                   |          |                 |          |
| 1 cell -1     | 88,997,195   | 46,364,183    | 52.10    | 39,799,020        | 44.72    | 2,833,992       | 3.18     |
| 1 cell -2     | 130,341,634  | 52,390,968    | 40.20    | 76,793,663        | 58.92    | 1,157,003       | 0.89     |
| 1 cell -3     | 47,845,402   | 21,737,512    | 45.43    | 25,440,448        | 53.17    | 667,442         | 1.39     |
| 10 cells -1   | 57,571,578   | 30,500,820    | 52.98    | 26,267,024        | 45.62    | 803,734         | 1.40     |
| 10 cells -2   | 48,498,112   | 30,645,411    | 63.19    | 17,382,824        | 35.84    | 469,877         | 0.97     |
| 10 cells -3   | 29,458,542   | 11,842,450    | 40.20    | 17,268,045        | 58.62    | 348,047         | 1.18     |
| 100 cells -1  | 37,701,354   | 21,960,024    | 58.25    | 15,467,146        | 41.03    | 274,184         | 0.73     |
| 100 cells -2  | 20,756,129   | 13,614,385    | 65.59    | 6,976,694         | 33.61    | 165,050         | 0.80     |
| 100 cells -3  | 59,111,226   | 34,141,121    | 57.76    | 24,530,651        | 41.50    | 439,454         | 0.74     |
| NPC nuclei    |              |               |          |                   |          |                 |          |
| 1 nucleus -1  | 103,775,925  | 40,046,520    | 38.59    | 60,537,577        | 58.33    | 3,191,828       | 3.08     |
| 1 nucleus -2  | 161,855,470  | 47,637,824    | 29.43    | 112,932,010       | 69.77    | 1,285,636       | 0.79     |
| 1 nucleus -3  | 33,789,450   | 7,515,379     | 22.24    | 25,791,447        | 76.33    | 482,624         | 1.43     |
| 10 nuclei -1  | 39,045,664   | 12,602,634    | 32.28    | 14,012,036        | 35.89    | 12,430,994      | 31.84    |
| 10 nuclei -2  | 23,692,971   | 7,668,648     | 32.37    | 15,711,450        | 66.31    | 312,873         | 1.32     |
| 10 nuclei -3  | 26,683,050   | 12,904,655    | 48.36    | 13,577,879        | 50.89    | 200,516         | 0.75     |
| 100 nuclei -1 | 13,850,974   | 8,977,623     | 64.82    | 4,594,622         | 33.17    | 278,729         | 2.01     |
| 100 nuclei -2 | 14,663,334   | 7,796,708     | 53.17    | 6,558,245         | 44.73    | 308,381         | 2.10     |
| 100 nuclei -3 | 4,557,367    | 2,363,315     | 51.86    | 2,084,839         | 45.75    | 109,213         | 2.40     |
| DG nuclei     |              |               |          |                   |          |                 |          |
| 1 nucleus -1  | 37,303,022   | 30,934,184    | 82.93    | 6,051,810         | 16.22    | 317,028         | 0.85     |
| 1 nucleus -2  | 86,092,621   | 70,274,129    | 81.63    | 15,102,771        | 17.54    | 715,721         | 0.83     |
| control       | 45,676,405   | 34,547,610    | 75.64    | 10,925,111        | 23.92    | 203,684         | 0.45     |

**Table S3.** Neural progenitor cell markers and housekeeping genes with non-intronic (exon specific) reads.

| Gene name       | Full gene name                                                            | MGI ID      |
|-----------------|---------------------------------------------------------------------------|-------------|
| <i>Actb</i>     | actin, beta                                                               | MGI:87904   |
| <i>Aldoc</i>    | aldolase C, fructose-bisphosphate                                         | MGI:101863  |
| <i>ApoE</i>     | apolipoprotein E                                                          | MGI:88057   |
| <i>Ascl1</i>    | achaete-scute complex homolog 1                                           | MGI:96919   |
| <i>Atp1a1</i>   | ATPase, Na <sup>+</sup> /K <sup>+</sup> transporting, alpha 1 polypeptide | MGI:88105   |
| <i>Bex2</i>     | brain expressed X-linked 2                                                | MGI:1338017 |
| <i>Ccnd1</i>    | cyclin D1                                                                 | MGI:88313   |
| <i>Cct3</i>     | chaperonin containing Tcp1, subunit 3 (gamma)                             | MGI:104708  |
| <i>Cct5</i>     | chaperonin containing Tcp1, subunit 5 (epsilon)                           | MGI:107185  |
| <i>Cct7</i>     | chaperonin containing Tcp1, subunit 7 (eta)                               | MGI:107184  |
| <i>CD15</i>     | fucosyltransferase 4                                                      | MGI:95594   |
| <i>CD81</i>     | CD81 antigen                                                              | MGI:1096398 |
| <i>CD9</i>      | CD9 antigen                                                               | MGI:88348   |
| <i>Chmp2a</i>   | charged multivesicular body protein 2A                                    | MGI:1916203 |
| <i>Dbi</i>      | diazepam binding inhibitor                                                | MGI:94865   |
| <i>Eef1a1</i>   | eukaryotic translation elongation factor 1 alpha 1                        | MGI:1096881 |
| <i>Eef2</i>     | eukaryotic translation elongation factor 2                                | MGI:95288   |
| <i>Fabp7</i>    | fatty acid binding protein 7, brain                                       | MGI:101916  |
| <i>Fos</i>      | FBJ osteosarcoma oncogene                                                 | MGI:95574   |
| <i>FoxG1</i>    | forkhead box G1                                                           | MGI:1347464 |
| <i>Fut4</i>     | fucosyltransferase 4                                                      | MGI:95594   |
| <i>H2afz</i>    | H2A histone family, member Z                                              | MGI:1888388 |
| <i>Hist1h1c</i> | histone cluster 1, H1c                                                    | MGI:1931526 |
| <i>Hist1h1e</i> | histone cluster 1, H1e                                                    | MGI:1931527 |
| <i>Hist1h4i</i> | histone cluster 1, H4i                                                    | MGI:2448432 |
| <i>Hsp90ab1</i> | heat shock protein 90 alpha (cytosolic), class B member 1                 | MGI:96247   |
| <i>Hspa8</i>    | heat shock protein 8                                                      | MGI:105384  |
| <i>Id1</i>      | inhibitor of DNA binding 1                                                | MGI:96396   |
| <i>Id2</i>      | inhibitor of DNA binding 2                                                | MGI:96397   |
| <i>Ldhb</i>     | lactate dehydrogenase B                                                   | MGI:96763   |
| <i>Nestin</i>   | nestin                                                                    | MGI:101784  |
| <i>Olig2</i>    | oligodendrocyte transcription factor 2                                    | MGI:1355331 |
| <i>Pa2g4</i>    | proliferation-associated 2G4                                              | MGI:894684  |
| <i>Pou3f2</i>   | POU domain, class 3, transcription factor 2                               | MGI:101895  |
| <i>Pou3f4</i>   | POU domain, class 3, transcription factor 4                               | MGI:101894  |
| <i>PPIA</i>     | peptidylprolyl isomerase A                                                | MGI:97749   |
| <i>Rpl13</i>    | ribosomal protein L13                                                     | MGI:105922  |
| <i>Rpl14</i>    | ribosomal protein L14                                                     | MGI:1914365 |
| <i>Rps2</i>     | ribosomal protein S2                                                      | MGI:105110  |
| <i>Rps3</i>     | ribosomal protein S3                                                      | MGI:1350917 |
| <i>Rpsa</i>     | ribosomal protein SA                                                      | MGI:105381  |
| <i>Sfpq</i>     | splicing factor proline/glutamine rich                                    | MGI:1918764 |
| <i>Sox1</i>     | SRY-box containing gene 1                                                 | MGI:98357   |

|               |                                                        |             |
|---------------|--------------------------------------------------------|-------------|
| <i>Sox11</i>  | SRY-box containing gene 11                             | MGI:98359   |
| <i>Sox2</i>   | SRY-box containing gene 2                              | MGI:98364   |
| <i>Sox21</i>  | SRY-box containing gene 21                             | MGI:2654070 |
| <i>Sox3</i>   | SRY-box containing gene 3                              | MGI:98365   |
| <i>Strap</i>  | serine/threonine kinase receptor associated protein    | MGI:1329037 |
| <i>Tomm22</i> | translocase of outer mitochondrial membrane 22 homolog | MGI:2450248 |
| <i>Vim</i>    | vimentin                                               | MGI:98932   |

---

**Table S4.** Differential accumulation of transcripts between nuclei and whole cells.

| Column ID                     | Gene Symbol   | Transcript        | p-value(Nuclei vs. Whole cells) | FoldChange (Nuclei vs. Whole cells) | FoldChange (Nuclei vs. Whole cells) |
|-------------------------------|---------------|-------------------|---------------------------------|-------------------------------------|-------------------------------------|
| NM_207261>Kcnk18              | Kcnk18        | NM_207261         | 0.0259213                       | 32.9303                             | Nuclei up vs Whole cells            |
| NM_001080553>Gsg1             | Gsg1          | NM_001080553      | 0.0076710                       | 6                                   | Nuclei up vs Whole cells            |
| NM_010352>Gsg1                | Gsg1          | NM_010352         | 0.0076710                       | 9                                   | Nuclei up vs Whole cells            |
| NM_001038590>Cldn19           | Cldn19        | NM_001038590      | 0.0185929                       | 30.5443                             | Nuclei up vs Whole cells            |
| NM_028092>Slc39a5             | Slc39a5       | NM_028092         | 0.0279075                       | 30.1003                             | Nuclei up vs Whole cells            |
| NM_053110>Gpnmb               | Gpnmb         | NM_053110         | 0.0122546                       | 29.2083                             | Nuclei up vs Whole cells            |
| NM_029326>1700018L24Rik       | 1700018L24Rik | NM_029326         | 0.0456587                       | 28.7776                             | Nuclei up vs Whole cells            |
| NM_016873>Wisp2               | Wisp2         | NM_016873         | 0.0329411                       | 27.0517                             | Nuclei up vs Whole cells            |
| NM_172776>D630002G06Rik       | D630002G06Rik | NM_172776         | 0.0334497                       | 24.3775                             | Nuclei up vs Whole cells            |
| NM_001037800>Cd209b           | Cd209b        | NM_001037800      | 0.0237352                       | 23.0353                             | Nuclei up vs Whole cells            |
| NM_009880>Cdx1                | Cdx1          | NM_009880         | 0.0433389                       | 22.0012                             | Nuclei up vs Whole cells            |
| NM_147073>Olfr33              | Olfr33        | NM_147073         | 0.0370179                       | 21.9078                             | Nuclei up vs Whole cells            |
| NR_027137>Gm10565             | Gm10565       | NR_027137         | 1.24E-08                        | 18.4231                             | Nuclei up vs Whole cells            |
| NM_172944>Itgae               | Itgae         | NM_172944         | 0.0316746                       | 17.887                              | Nuclei up vs Whole cells            |
| NM_001159275>Slc25a2          | Slc25a2       | NM_001159275      | 0.0302349                       | 17.8153                             | Nuclei up vs Whole cells            |
| NM_027072>Plac8l1             | Plac8l1       | NM_027072         | 0.0120059                       | 16.956                              | Nuclei up vs Whole cells            |
| NR_033588>AY512931            | AY512931      | NR_033588         | 0.0009372                       | 18                                  | Nuclei up vs Whole cells            |
| NM_008438>Kera                | Kera          | NM_008438         | 0.0029289                       | 4                                   | Nuclei up vs Whole cells            |
| NM_010611>Kcnq2               | Kcnq2         | NM_010611         | 0.0330587                       | 16.0979                             | Nuclei up vs Whole cells            |
| NM_001079865>Ces2f            | Ces2f         | NM_001079865      | 0.0325815                       | 15.745                              | Nuclei up vs Whole cells            |
| NR_003248>Foxl2os             | Foxl2os       | NR_003248         | 0.0212267                       | 15.2969                             | Nuclei up vs Whole cells            |
| NM_147080>Olfr615             | Olfr615       | NM_147080         | 0.0160466                       | 14.8496                             | Nuclei up vs Whole cells            |
| NM_001145015>Arhgap40         | Arhgap40      | NM_001145015      | 0.0060464                       | 3                                   | Nuclei up vs Whole cells            |
| NM_001170851>Klra2            | Klra2         | NM_001170851      | 0.0327288                       | 14.5646                             | Nuclei up vs Whole cells            |
| NM_001034851>Fam134b          | Fam134b       | NM_001034851      | 0.0342995                       | 14.0756                             | Nuclei up vs Whole cells            |
| NM_008006>Fgf2                | Fgf2          | NM_008006         | 0.0423801                       | 13.9405                             | Nuclei up vs Whole cells            |
| NM_001166638_dup3>Gm4303_dup3 | Gm4303_dup3   | NM_001166638_dup3 | 0.0432971                       | 13.7245                             | Nuclei up vs Whole cells            |
| NM_001166639_dup3>Gm4305_dup3 | Gm4305_dup3   | NM_001166639_dup3 | 0.0432971                       | 13.7245                             | Nuclei up vs Whole cells            |
| NM_001166641_dup3>Gm4307_dup3 | Gm4307_dup3   | NM_001166641_dup3 | 0.0432971                       | 13.7245                             | Nuclei up vs Whole cells            |
| NM_001009548>4930529F22Rik    | 4930529F22Rik | NM_001009548      | 0.0198921                       | 12.9524                             | Nuclei up vs Whole cells            |

|                         |               |              |                        |           |                          |                          |
|-------------------------|---------------|--------------|------------------------|-----------|--------------------------|--------------------------|
| NM_008293>Hsd3b1        | Hsd3b1        | NM_008293    | 0.0373183<br>0.0028029 | 12.8473   | Nuclei up vs Whole cells |                          |
| NM_194069>Ifi27l1       | Ifi27l1       | NM_194069    | 4                      | 12.7908   | Nuclei up vs Whole cells |                          |
| NM_173779>Ankrd58       | Ankrd58       | NM_173779    | 0.0424858<br>0.0033487 | 12.6388   | Nuclei up vs Whole cells |                          |
| NM_139301>Catsper1      | Catsper1      | NM_139301    | 8                      | 12.5615   | Nuclei up vs Whole cells |                          |
| NM_001003952>Sval3      | Sval3         | NM_001003952 | 0.0088607<br>8         | 12.2222   | Nuclei up vs Whole cells |                          |
| NM_022014>Fn3k          | Fn3k          | NM_022014    | 4                      | 12.0932   | Nuclei up vs Whole cells |                          |
| NM_001008426>Gm5531     | Gm5531        | NM_001008426 | 0.0004235<br>72        | 12.0269   | Nuclei up vs Whole cells |                          |
| NM_011872>Klk7          | Klk7          | NM_011872    | 3                      | 11.7867   | Nuclei up vs Whole cells |                          |
| NM_018792>Hils1         | Hils1         | NM_018792    | 0.0249981              | 11.6674   | Nuclei up vs Whole cells |                          |
| NM_001033206>Pwpp2b     | Pwpp2b        | NM_001033206 | 6                      | 0.0298047 | Nuclei up vs Whole cells |                          |
| NM_199013>Irgc1         | Irgc1         | NM_199013    | 0.0421075              | 11.2067   | Nuclei up vs Whole cells |                          |
| NM_001113391>Cd247      | Cd247         | NM_001113391 | 1                      | 0.031263  | 10.964                   | Nuclei up vs Whole cells |
| NR_028591>Gm14005       | Gm14005       | NR_028591    | 0.0179678              | 10.857    | Nuclei up vs Whole cells |                          |
| NM_029061>Ccdc7         | Ccdc7         | NM_029061    | 0.0426827              | 10.7846   | Nuclei up vs Whole cells |                          |
| NR_029414>Gsdmcl-ps     | Gsdmcl-ps     | NR_029414    | 0.0345501              | 10.6806   | Nuclei up vs Whole cells |                          |
| NM_001195258>Gm14378    | Gm14378       | NM_001195258 | 8                      | 0.0342597 | 10.5989                  | Nuclei up vs Whole cells |
| NM_001099688>Fbxo39     | Fbxo39        | NM_001099688 | 8                      | 0.0174352 | 10.548                   | Nuclei up vs Whole cells |
| NM_198415>Ckmt2         | Ckmt2         | NM_198415    | 0.0234437              | 10.283    | Nuclei up vs Whole cells |                          |
| NM_001172481>Aspn       | Aspn          | NM_001172481 | 1                      | 0.0433687 | 9.56592                  | Nuclei up vs Whole cells |
| NM_178738>Prss35        | Prss35        | NM_178738    | 0.0253698              | 9.49154   | Nuclei up vs Whole cells |                          |
| NM_011286>Rph3a         | Rph3a         | NM_011286    | 0.0166845<br>0.0019631 | 9.33287   | Nuclei up vs Whole cells |                          |
| NM_030596>Dsg3          | Dsg3          | NM_030596    | 5                      | 9.15125   | Nuclei up vs Whole cells |                          |
| NM_001037166>Gm4925     | Gm4925        | NM_001037166 | 6                      | 0.0168733 | 8.95151                  | Nuclei up vs Whole cells |
| NM_001081106>Cyt1l1     | Cyt1l1        | NM_001081106 | 6                      | 0.0160729 | 8.90225                  | Nuclei up vs Whole cells |
| NM_178257>Il22ra1       | Il22ra1       | NM_178257    | 0.0351971              | 8.84032   | Nuclei up vs Whole cells |                          |
| NM_011477>Sprr2k        | Sprr2k        | NM_011477    | 0.034149               | 8.68925   | Nuclei up vs Whole cells |                          |
| NM_001110267>Vegfa      | Vegfa         | NM_001110267 | 7                      | 0.0238397 | 8.67245                  | Nuclei up vs Whole cells |
| NM_001110268>Vegfa      | Vegfa         | NM_001110268 | 8                      | 0.0238395 | 8.67244                  | Nuclei up vs Whole cells |
| NM_001110266>Vegfa      | Vegfa         | NM_001110266 | 6                      | 0.0238395 | 8.67243                  | Nuclei up vs Whole cells |
| NM_145831>Dmrt2         | Dmrt2         | NM_145831    | 0.0414498              | 8.6041    | Nuclei up vs Whole cells |                          |
| NM_017372>Lyz2          | Lyz2          | NM_017372    | 0.0118585              | 8.59227   | Nuclei up vs Whole cells |                          |
| NM_027600>4921504E06Rik | 4921504E06Rik | NM_027600    | 0.0265725              | 8.56998   | Nuclei up vs Whole cells |                          |
| NR_001570>Xist          | Xist          | NR_001570    | 0.0396399              | 8.53533   | Nuclei up vs Whole cells |                          |
| NM_175476>Arhgap25      | Arhgap25      | NM_175476    | 0.0349165              | 8.30042   | Nuclei up vs Whole cells |                          |
| NM_177676>4931409K22Rik | 4931409K22Rik | NM_177676    | 0.0053400<br>9         | 8.21177   | Nuclei up vs Whole cells |                          |



|                                |               |                   |                              |           |                          |                          |
|--------------------------------|---------------|-------------------|------------------------------|-----------|--------------------------|--------------------------|
| NM_145845>Vmn1r192             | Vmn1r192      | NM_145845         | 0.0479842                    | 8.16903   | Nuclei up vs Whole cells |                          |
| NM_028737>4931406B18Rik        | 4931406B18Rik | NM_028737         | 0.0171372                    | 8.13054   | Nuclei up vs Whole cells |                          |
| NM_001045526>A430084P05Rik     | A430084P05Rik | NM_001045526      | 0.0161973                    | 8.04145   | Nuclei up vs Whole cells |                          |
| NM_030710>Slamf6               | Slamf6        | NM_030710         | 0.0428082<br>0.0078262       | 8.02463   | Nuclei up vs Whole cells |                          |
| NM_008109>Gdf5                 | Gdf5          | NM_008109         | 4                            | 8.02408   | Nuclei up vs Whole cells |                          |
| NM_010045>Darc                 | Darc          | NM_010045         | 0.0161304                    | 7.99827   | Nuclei up vs Whole cells |                          |
| NM_001122736>Igf2              | Igf2          | NM_001122736      | 6                            | 0.0277919 | 7.99344                  | Nuclei up vs Whole cells |
| NM_010558>Il5                  | Il5           | NM_010558         | 0.0458584                    | 7.78246   | Nuclei up vs Whole cells |                          |
| NM_028654>4930404H21Rik        | 4930404H21Rik | NM_028654         | 0.0002175<br>52<br>0.0055346 | 7.51968   | Nuclei up vs Whole cells |                          |
| NM_019506>Gdf2                 | Gdf2          | NM_019506         | 5                            | 7.5095    | Nuclei up vs Whole cells |                          |
| NM_001004184>Slc28a1           | Slc28a1       | NM_001004184      | 0.0021744<br>4<br>9          | 7.46534   | Nuclei up vs Whole cells |                          |
| NM_172142>Nfkbid               | Nfkbid        | NM_172142         | 0.0315665                    | 7.44135   | Nuclei up vs Whole cells |                          |
| NM_008092>Gata4                | Gata4         | NM_008092         | 1.01E-05                     | 7.32932   | Nuclei up vs Whole cells |                          |
| NM_020577>As3mt                | As3mt         | NM_020577         | 0.0174042                    | 7.24199   | Nuclei up vs Whole cells |                          |
| NM_001177756>Pfkfb3            | Pfkfb3        | NM_001177756      | 6                            | 0.0298474 | 7.11594                  | Nuclei up vs Whole cells |
| NM_001177753>Pfkfb3            | Pfkfb3        | NM_001177753      | 3                            | 0.0298484 | 7.11548                  | Nuclei up vs Whole cells |
| NM_153795>Fermt3               | Fermt3        | NM_153795         | 0.019649                     | 7.08292   | Nuclei up vs Whole cells |                          |
| NM_183193>Foxi2                | Foxi2         | NM_183193         | 0.0139603                    | 7.03085   | Nuclei up vs Whole cells |                          |
| NM_001177755>Pfkfb3            | Pfkfb3        | NM_001177755      | 5                            | 0.0301947 | 7.01076                  | Nuclei up vs Whole cells |
| NM_001164804>Coro2a            | Coro2a        | NM_001164804      | 4                            | 0.0268896 | 6.96116                  | Nuclei up vs Whole cells |
| NM_001142960>Bcl2l15           | Bcl2l15       | NM_001142960      | 0                            | 0.0156664 | 6.93665                  | Nuclei up vs Whole cells |
| NM_010741>Ly6c1                | Ly6c1         | NM_010741         | 0.0230316                    | 6.9216    | Nuclei up vs Whole cells |                          |
| NM_001146351>Ephb6             | Ephb6         | NM_001146351      | 1                            | 0.0172309 | 6.89613                  | Nuclei up vs Whole cells |
| NM_007680>Ephb6                | Ephb6         | NM_007680         | 0.017231                     | 6.89612   | Nuclei up vs Whole cells |                          |
| NM_001097977_dup1>Gm14151_dup1 | Gm14151_dup1  | NM_001097977_dup1 | 7_dup1                       | 0.0292118 | 6.86337                  | Nuclei up vs Whole cells |
| NM_172815>Rspo2                | Rspo2         | NM_172815         | 0.0325743<br>0.0057231       | 6.85351   | Nuclei up vs Whole cells |                          |
| NM_007887>Dub1                 | Dub1          | NM_007887         | 1                            | 6.83837   | Nuclei up vs Whole cells |                          |
| NM_001011812>Olf r951          | Olf r951      | NM_001011812      | 2                            | 0.0483078 | 6.74582                  | Nuclei up vs Whole cells |
| NM_019784>Tex21                | Tex21         | NM_019784         | 0.042456                     | 6.68585   | Nuclei up vs Whole cells |                          |
| NM_008318>Ibsp                 | Ibsp          | NM_008318         | 0.0212626                    | 6.67522   | Nuclei up vs Whole cells |                          |
| NM_019549>Plek                 | Plek          | NM_019549         | 0.0231236                    | 6.63543   | Nuclei up vs Whole cells |                          |
| NM_001039720>9030619P08Rik     | 9030619P08Rik | NM_001039720      | 0                            | 0.017819  | 6.57481                  | Nuclei up vs Whole cells |
| NM_021508>Myoz1                | Myoz1         | NM_021508         | 0.0187761                    | 6.51622   | Nuclei up vs Whole cells |                          |
| NM_177686>Clec12a              | Clec12a       | NM_177686         | 0.0488787                    | 6.50617   | Nuclei up vs Whole cells |                          |
| NM_021609>Ccbp2                | Ccbp2         | NM_021609         | 0.0121685                    | 6.49224   | Nuclei up vs Whole cells |                          |
| NR_033433>2900079G21Rik        | 2900079G21Rik | NR_033433         | 0.0316663                    | 6.48121   | Nuclei up vs Whole cells |                          |

|                            |               |              |                        |           |                          |                          |
|----------------------------|---------------|--------------|------------------------|-----------|--------------------------|--------------------------|
| NM_016704>C6               | C6            | NM_016704    | 0.0039169              | 6.46163   | Nuclei up vs Whole cells |                          |
| NM_026290>4930511111Rik    | 4930511111Rik | NM_026290    | 0.026612<br>0.0095559  | 6.31005   | Nuclei up vs Whole cells |                          |
| NM_007651>Cd53             | Cd53          | NM_007651    | 9                      | 6.3002    | Nuclei up vs Whole cells |                          |
| NM_198096>Arap1            | Arap1         | NM_198096    | 0.0211743              | 6.27331   | Nuclei up vs Whole cells |                          |
| NM_201608>H2-M10.3         | H2-M10.3      | NM_201608    | 0.03795                | 6.27      | Nuclei up vs Whole cells |                          |
| NM_023907>Foxi1            | Foxi1         | NM_023907    | 0.0405673              | 6.23746   | Nuclei up vs Whole cells |                          |
| NM_010250>Gabra1           | Gabra1        | NM_010250    | 0.0028762              | 5         | 6.21055                  | Nuclei up vs Whole cells |
| NM_027220>Prss32           | Prss32        | NM_027220    | 0.0322237              | 6.20369   | Nuclei up vs Whole cells |                          |
| NM_027572>Slc22a16         | Slc22a16      | NM_027572    | 0.0454912              | 6.1977    | Nuclei up vs Whole cells |                          |
| NM_001172207>Lrtm2         | Lrtm2         | NM_001172207 | 0.0012475              | 4         | 6.19644                  | Nuclei up vs Whole cells |
| NM_146978>Olfr1258         | Olfr1258      | NM_146978    | 0.0349401<br>0.0036028 | 6.1166    | Nuclei up vs Whole cells |                          |
| NM_170673>Cpne9            | Cpne9         | NM_170673    | 3                      | 6.0776    | Nuclei up vs Whole cells |                          |
| NM_001177897>9830107B12Rik | 9830107B12Rik | NM_001177897 | 7                      | 0.0417668 | 6.06758                  | Nuclei up vs Whole cells |
| NM_198642>5031414D18Rik    | 5031414D18Rik | NM_198642    | 6.38E-05               | 6.0036    | Nuclei up vs Whole cells |                          |
| NM_001085419>Gm13102       | Gm13102       | NM_001085419 | 0.0069875              | 9         | 5.92878                  | Nuclei up vs Whole cells |
| NM_146077>Trim31           | Trim31        | NM_146077    | 0.0099838              | 2         | 5.9131                   | Nuclei up vs Whole cells |
| NM_008685>Nfe21            | Nfe21         | NM_008685    | 0.0131159              | 5.90672   | Nuclei up vs Whole cells |                          |
| NM_001164229>Nrf1          | Nrf1          | NM_001164229 | 9                      | 0.0375182 | 5.81975                  | Nuclei up vs Whole cells |
| NM_011724>Xirp1            | Xirp1         | NM_011724    | 0.0123851<br>0.0016832 | 5.81227   | Nuclei up vs Whole cells |                          |
| NM_011067>Per3             | Per3          | NM_011067    | 6                      | 5.81188   | Nuclei up vs Whole cells |                          |
| NM_178669>Clrn3            | Clrn3         | NM_178669    | 0.0231537              | 5.67265   | Nuclei up vs Whole cells |                          |
| NM_001077705>Ptpn6         | Ptpn6         | NM_001077705 | 5                      | 0.0483223 | 5.67008                  | Nuclei up vs Whole cells |
| NM_053079>Slc15a1          | Slc15a1       | NM_053079    | 0.0073102              | 6         | 5.59742                  | Nuclei up vs Whole cells |
| NM_010596>Kcna7            | Kcna7         | NM_010596    | 9                      | 5.58035   | Nuclei up vs Whole cells |                          |
| NM_001109753>Sv2b          | Sv2b          | NM_001109753 | 0.0041479              | 2         | 5.56641                  | Nuclei up vs Whole cells |
| NM_199473>Col8a2           | Col8a2        | NM_199473    | 56                     | 0.0002666 | 5.52074                  | Nuclei up vs Whole cells |
| NM_001081663>Btln7         | Btln7         | NM_001081663 | 3                      | 0.0280777 | 5.4975                   | Nuclei up vs Whole cells |
| NR_033472>Gm10768          | Gm10768       | NR_033472    | 0.0009871              | 05        | 5.48074                  | Nuclei up vs Whole cells |
| NM_178747>Gulo             | Gulo          | NM_178747    | 0.0333997              | 5.46703   | Nuclei up vs Whole cells |                          |
| NM_146849>Olfr1157         | Olfr1157      | NM_146849    | 0.0148258              | 5.45135   | Nuclei up vs Whole cells |                          |
| NM_010149>Epor             | Epor          | NM_010149    | 0.0154369              | 5.43651   | Nuclei up vs Whole cells |                          |
| NM_170730>Ank3             | Ank3          | NM_170730    | 0.0351953              | 5.39619   | Nuclei up vs Whole cells |                          |
| NR_033543>Gm16287          | Gm16287       | NR_033543    | 0.0455593              | 5.36784   | Nuclei up vs Whole cells |                          |
| NM_009307>Synt2            | Synt2         | NM_009307    | 0.0465264              | 5.31749   | Nuclei up vs Whole cells |                          |
| NR_033556>A630010A05Rik    | A630010A05Rik | NR_033556    | 0.0434043              | 5.25633   | Nuclei up vs Whole cells |                          |

|                         |               |              |           |         |                          |                          |
|-------------------------|---------------|--------------|-----------|---------|--------------------------|--------------------------|
| NM_178767>Tmem195       | Tmem195       | NM_178767    | 0.0310538 | 5.24047 | Nuclei up vs Whole cells |                          |
| NM_001163498>Rundc2a    | Rundc2a       | NM_001163498 | 0.0386938 | 5.23843 | Nuclei up vs Whole cells |                          |
| NM_173031>BC066135      | BC066135      | NM_173031    | 0.0437084 | 5.20013 | Nuclei up vs Whole cells |                          |
| NM_177638>Crb3          | Crb3          | NM_177638    | 0.0373266 | 5.18924 | Nuclei up vs Whole cells |                          |
| NM_178036>Lcn10         | Lcn10         | NM_178036    | 0.0312151 | 5.18779 | Nuclei up vs Whole cells |                          |
| NM_172887>Fry           | Fry           | NM_172887    | 0.015197  | 5.10664 | Nuclei up vs Whole cells |                          |
| NM_013731>Sgk2          | Sgk2          | NM_013731    | 0.0200449 | 5.10575 | Nuclei up vs Whole cells |                          |
| NM_183222>Fcr15         | Fcr15         | NM_183222    | 0.0090503 | 5       | 5.10286                  | Nuclei up vs Whole cells |
| NM_001001714>Sohlh1     | Sohlh1        | NM_001001714 | 0.0461846 | 5.05325 | Nuclei up vs Whole cells |                          |
| NM_001160268>Plekha6    | Plekha6       | NM_001160268 | 0.0072096 | 1       | 5.03858                  | Nuclei up vs Whole cells |
| NR_033207>201001618Rik  | 201001618Rik  | NR_033207    | 0.0143607 | 5.02758 | Nuclei up vs Whole cells |                          |
| NM_199154>Tas2r107      | Tas2r107      | NM_199154    | 0.0459807 | 5.01125 | Nuclei up vs Whole cells |                          |
| NR_033616>Pldi          | Pldi          | NR_033616    | 0.0194964 | 5.00535 | Nuclei up vs Whole cells |                          |
| NM_016911>SrpX          | SrpX          | NM_016911    | 0.0401532 | 5.00023 | Nuclei up vs Whole cells |                          |
| NM_001145096>Hhla1      | Hhla1         | NM_001145096 | 0.0098313 | 4       | 4.99336                  | Nuclei up vs Whole cells |
| NM_023653>Wnt2          | Wnt2          | NM_023653    | 0.0192982 | 4.99215 | Nuclei up vs Whole cells |                          |
| NM_027770>Col24a1       | Col24a1       | NM_027770    | 0.0013306 | 4.98628 | Nuclei up vs Whole cells |                          |
| NM_009578>Ikzf1         | Ikzf1         | NM_009578    | 0.0257547 | 4.97489 | Nuclei up vs Whole cells |                          |
| NM_183015>Ccnb3         | Ccnb3         | NM_183015    | 0.0310704 | 4.97337 | Nuclei up vs Whole cells |                          |
| NM_030728>9930013L23Rik | 9930013L23Rik | NM_030728    | 0.0213917 | 4.96949 | Nuclei up vs Whole cells |                          |
| NM_008026>Fli1          | Fli1          | NM_008026    | 0.0068206 | 4.96308 | Nuclei up vs Whole cells |                          |
| NM_013811>Dnahc8        | Dnahc8        | NM_013811    | 0.030975  | 4.94225 | Nuclei up vs Whole cells |                          |
| NM_173029>Adcy10        | Adcy10        | NM_173029    | 0.0174529 | 4.93766 | Nuclei up vs Whole cells |                          |
| NM_008091>Gata3         | Gata3         | NM_008091    | 0.0002615 | 54      | 4.93522                  | Nuclei up vs Whole cells |
| NM_177076>Fbxl13        | Fbxl13        | NM_177076    | 0.0089009 | 8       | 4.88594                  | Nuclei up vs Whole cells |
| NR_036630>Gm1082        | Gm1082        | NR_036630    | 0.0482847 | 4.84621 | Nuclei up vs Whole cells |                          |
| NM_028772>Dmgdh         | Dmgdh         | NM_028772    | 0.0124709 | 4.83315 | Nuclei up vs Whole cells |                          |
| NM_025276>Evpl          | Evpl          | NM_025276    | 0.0354202 | 4.82927 | Nuclei up vs Whole cells |                          |
| NM_022995>Pmepa1        | Pmepa1        | NM_022995    | 0.0006554 | 78      | 4.79457                  | Nuclei up vs Whole cells |
| NM_008090>Gata2         | Gata2         | NM_008090    | 0.0099680 | 4       | 4.78947                  | Nuclei up vs Whole cells |
| NM_011318>Apcs          | Apcs          | NM_011318    | 0.0091789 | 7       | 4.78801                  | Nuclei up vs Whole cells |
| NM_019992>Stap1         | Stap1         | NM_019992    | 0.0136753 | 4.77481 | Nuclei up vs Whole cells |                          |
| NM_009821>Runx1         | Runx1         | NM_009821    | 5.33E-05  | 4.75382 | Nuclei up vs Whole cells |                          |
| NM_153062>Slc37a1       | Slc37a1       | NM_153062    | 0.0111562 | 4.74738 | Nuclei up vs Whole cells |                          |
| NM_175448>Clvs2         | Clvs2         | NM_175448    | 0.0450876 | 4.74168 | Nuclei up vs Whole cells |                          |
| NM_010278>Gfi1          | Gfi1          | NM_010278    | 0.0297163 | 4.6982  | Nuclei up vs Whole cells |                          |

|                            |               |             |           |         |                          |
|----------------------------|---------------|-------------|-----------|---------|--------------------------|
| NM_008498>Lhx1             | Lhx1          | NM_008498   | 6.73E-05  | 4.69455 | Nuclei up vs Whole cells |
| NM_153541>Zbtb8b           | Zbtb8b        | NM_153541   | 0.0173955 | 4.68923 | Nuclei up vs Whole cells |
| NM_001013390>Scn4b         | Scn4b         | NM_00101339 | 0.0021484 |         |                          |
| NM_001008230>Rtp2          | Rtp2          | 0           | 6         | 4.66839 | Nuclei up vs Whole cells |
|                            |               | NM_00100823 |           |         |                          |
|                            |               | 0           | 0.0427621 | 4.6602  | Nuclei up vs Whole cells |
|                            |               |             | 0.0088497 |         |                          |
| NM_153105>Cldn19           | Cldn19        | NM_153105   | 7         | 4.63905 | Nuclei up vs Whole cells |
| NM_001081254>Fam186b       | Fam186b       | NM_00108125 |           |         |                          |
| NM_176942>Gabra5           | Gabra5        | 4           | 0.0296634 | 4.6377  | Nuclei up vs Whole cells |
| NM_013660>Sema4d           | Sema4d        | NM_176942   | 0.0338321 | 4.63728 | Nuclei up vs Whole cells |
|                            |               |             | 0.0064670 |         |                          |
| NM_001001489>BC021785      | BC021785      | NM_013660   | 4         | 4.63064 | Nuclei up vs Whole cells |
| NR_015571>4930471G03Rik    | 4930471G03Rik | NM_00100148 | 0.0070207 |         |                          |
|                            |               | 9           | 5         | 4.59825 | Nuclei up vs Whole cells |
| NM_010226>Foxs1            | Foxs1         | NR_015571   | 0.0235436 | 4.58923 | Nuclei up vs Whole cells |
| NM_201370>Wee2             | Wee2          | NM_010226   | 0.03708   | 4.58877 | Nuclei up vs Whole cells |
| NM_010130>Emr1             | Emr1          | NM_201370   | 0.0355595 | 4.56445 | Nuclei up vs Whole cells |
| NM_001037937>Depdc6        | Depdc6        | NM_010130   | 0.0373065 | 4.56396 | Nuclei up vs Whole cells |
|                            |               | NM_00103793 | 0.0039915 |         |                          |
|                            |               | 7           | 1         | 4.54455 | Nuclei up vs Whole cells |
| NM_172508>Dse              | Dse           | NM_172508   | 0.0447869 | 4.49143 | Nuclei up vs Whole cells |
| NM_001039214>Mex3c         | Mex3c         | NM_00103921 |           |         |                          |
|                            |               | 4           | 0.0369534 | 4.47659 | Nuclei up vs Whole cells |
| NM_009308>Syt4             | Syt4          | NM_009308   | 0.0351425 | 4.44649 | Nuclei up vs Whole cells |
| NM_001013755>5730409E04Rik | 5730409E04Rik | NM_00101375 | 0.0072107 |         |                          |
| NM_001145950>5730409E04Rik | 5730409E04Rik | 5           | 3         | 4.43919 | Nuclei up vs Whole cells |
|                            |               | NM_00114595 | 0.0072107 |         |                          |
|                            |               | 0           | 3         | 4.43919 | Nuclei up vs Whole cells |
|                            |               |             | 0.0019271 |         |                          |
| NM_008425>Kcnj2            | Kcnj2         | NM_008425   | 1         | 4.43509 | Nuclei up vs Whole cells |
| NM_011704>Vnn1             | Vnn1          | NM_011704   | 0.0194034 | 4.39625 | Nuclei up vs Whole cells |
| NM_177431>Adamts20         | Adamts20      | NM_177431   | 0.0437042 | 4.39294 | Nuclei up vs Whole cells |
| NM_001033531>Klhl32        | Klhl32        | NM_00103353 |           |         |                          |
|                            |               | 1           | 0.0270713 | 4.37583 | Nuclei up vs Whole cells |
| NM_018754>Sfn              | Sfn           | NM_018754   | 0.0432357 | 4.36993 | Nuclei up vs Whole cells |
| NM_010686>Laptm5           | Laptm5        | NM_010686   | 0.0121067 | 4.35278 | Nuclei up vs Whole cells |
| NM_139200>Cytip            | Cytip         | NM_139200   | 0.0490818 | 4.34626 | Nuclei up vs Whole cells |
| NM_028075>Tnfrsf13c        | Tnfrsf13c     | NM_028075   | 1.92E-05  | 4.34491 | Nuclei up vs Whole cells |
| NM_028343>Tmem135          | Tmem135       | NM_028343   | 0.016982  | 4.32606 | Nuclei up vs Whole cells |
| NM_001170954>A4galt        | A4galt        | NM_00117095 | 0.0007223 |         |                          |
|                            |               | 4           | 18        | 4.32384 | Nuclei up vs Whole cells |
| NM_008082>Galr1            | Galr1         | NM_008082   | 0.0486485 | 4.31636 | Nuclei up vs Whole cells |
|                            |               |             | 0.0079621 |         |                          |
| NM_008873>Plau             | Plau          | NM_008873   | 8         | 4.29196 | Nuclei up vs Whole cells |
| NM_026862>Cd177            | Cd177         | NM_026862   | 0.0422918 | 4.28245 | Nuclei up vs Whole cells |
|                            |               |             | 0.0014264 |         |                          |
| NM_010932>Pnoc             | Pnoc          | NM_010932   | 9         | 4.27056 | Nuclei up vs Whole cells |
| NR_033532>B230206H07Rik    | B230206H07Rik | NR_033532   | 0.0183886 | 4.26954 | Nuclei up vs Whole cells |
| NM_001109873>Cbfa2t3       | Cbfa2t3       | NM_00110987 | 0.0002495 |         |                          |
|                            |               | 3           | 46        | 4.25997 | Nuclei up vs Whole cells |

|                            |               |                |                        |         |                          |
|----------------------------|---------------|----------------|------------------------|---------|--------------------------|
| NM_177289>Cbfa2t3          | Cbfa2t3       | NM_177289      | 0.0002495<br>49        | 4.25997 | Nuclei up vs Whole cells |
| NM_181072>Myo1e            | Myo1e         | NM_181072      | 0.0305234              | 4.24747 | Nuclei up vs Whole cells |
| NM_001161413>Slc3a2        | Slc3a2        | NM_001161413   | 0.035037<br>3          | 4.23982 | Nuclei up vs Whole cells |
| NR_033398>Gm9159           | Gm9159        | NR_033398      | 0.0002846<br>21        | 4.23244 | Nuclei up vs Whole cells |
| NM_001081052>Nhs           | Nhs           | NM_001081052   | 0.0362923<br>2         | 4.22133 | Nuclei up vs Whole cells |
| NM_001190406>Gas2l1        | Gas2l1        | NM_001190406   | 0.0366568<br>6         | 4.21    | Nuclei up vs Whole cells |
| NM_173749>Pamr1            | Pamr1         | NM_173749      | 0.0030332<br>7         | 4.19254 | Nuclei up vs Whole cells |
| NM_175342_dup1>Cphx_dup1   | Cphx_dup1     | NM_175342_dup1 | 0.0119937              | 4.16963 | Nuclei up vs Whole cells |
| NM_001037909>C130026I21Rik | C130026I21Rik | NM_001037909   | 0.0352156<br>9         | 4.15699 | Nuclei up vs Whole cells |
| NM_175219>C130026I21Rik    | C130026I21Rik | NM_175219      | 0.0352156              | 4.15699 | Nuclei up vs Whole cells |
| NM_023887>Gcnt2            | Gcnt2         | NM_023887      | 0.0392181              | 4.14987 | Nuclei up vs Whole cells |
| NM_001159538>Fgd2          | Fgd2          | NM_001159538   | 0.0416497<br>8         | 4.14857 | Nuclei up vs Whole cells |
| NM_013710>Fgd2             | Fgd2          | NM_013710      | 0.0416497              | 4.14857 | Nuclei up vs Whole cells |
| NM_008213>Hand1            | Hand1         | NM_008213      | 0.0495461              | 4.08572 | Nuclei up vs Whole cells |
| NM_001126487>Gm1027        | Gm1027        | NM_001126487   | 0.0413552<br>7         | 4.04348 | Nuclei up vs Whole cells |
| NM_007807>Cybb             | Cybb          | NM_007807      | 0.043819               | 3.97422 | Nuclei up vs Whole cells |
| NM_008550>Man2b2           | Man2b2        | NM_008550      | 0.0278977<br>0.0017207 | 3.9379  | Nuclei up vs Whole cells |
| NM_011077>Phex             | Phex          | NM_011077      | 0.0017207<br>7         | 3.93516 | Nuclei up vs Whole cells |
| NM_001110163>Pde4dip       | Pde4dip       | NM_001110163   | 0.0485885<br>3         | 3.9334  | Nuclei up vs Whole cells |
| NM_008239>Foxq1            | Foxq1         | NM_008239      | 0.0285887              | 3.90165 | Nuclei up vs Whole cells |
| NM_146734>Olfr478          | Olfr478       | NM_146734      | 0.0300762              | 3.89321 | Nuclei up vs Whole cells |
| NM_207210>Dyrk4            | Dyrk4         | NM_207210      | 0.0454084<br>0.0074902 | 3.88809 | Nuclei up vs Whole cells |
| NM_028623>Cst6             | Cst6          | NM_028623      | 0.0074902<br>2         | 3.88741 | Nuclei up vs Whole cells |
| NM_001039187>Ceacam1       | Ceacam1       | NM_001039187   | 0.0214607<br>7         | 3.8863  | Nuclei up vs Whole cells |
| NM_177709>Tusc5            | Tusc5         | NM_177709      | 0.0160145              | 3.88607 | Nuclei up vs Whole cells |
| NM_194064>Nanos2           | Nanos2        | NM_194064      | 0.0193511              | 3.88504 | Nuclei up vs Whole cells |
| NM_001081348>Hecw1         | Hecw1         | NM_001081348   | 7.24E-05<br>0.0053474  | 3.88218 | Nuclei up vs Whole cells |
| NM_008599>Cxcl9            | Cxcl9         | NM_008599      | 0.0053474<br>5         | 3.87246 | Nuclei up vs Whole cells |
| NM_019753>Cdh17            | Cdh17         | NM_019753      | 0.04787                | 3.86726 | Nuclei up vs Whole cells |
| NM_025763>4933436I01Rik    | 4933436I01Rik | NM_025763      | 0.0469292              | 3.86688 | Nuclei up vs Whole cells |
| NM_177123>Spef2            | Spef2         | NM_177123      | 0.0417809              | 3.85869 | Nuclei up vs Whole cells |
| NM_001168510>Ffar2         | Ffar2         | NM_001168510   | 0.0363798<br>0         | 3.8576  | Nuclei up vs Whole cells |
| NM_144943>Cd207            | Cd207         | NM_144943      | 0.0345845              | 3.85702 | Nuclei up vs Whole cells |
| NM_001146198>Nkx2-1        | Nkx2-1        | NM_001146198   | 0.0347061<br>8         | 3.85601 | Nuclei up vs Whole cells |
| NM_011109>Pla2g2d          | Pla2g2d       | NM_011109      | 0.0133866              | 3.83723 | Nuclei up vs Whole cells |

|                                |               |                   |           |         |                          |                          |
|--------------------------------|---------------|-------------------|-----------|---------|--------------------------|--------------------------|
| NM_008002>Fgf10                | Fgf10         | NM_008002         | 0.0168744 | 3.8314  | Nuclei up vs Whole cells |                          |
| NM_001039146>Vmn1r90           | Vmn1r90       | NM_001039146      | 0.0369416 | 3.82455 | Nuclei up vs Whole cells |                          |
| NM_001037923>Lekr1             | Lekr1         | NM_001037923      | 0.0428099 | 3.82336 | Nuclei up vs Whole cells |                          |
| NM_028721>Nphp3                | Nphp3         | NM_028721         | 0.0027960 | 7       | 3.82306                  | Nuclei up vs Whole cells |
| NR_033456>Gm4710               | Gm4710        | NR_033456         | 0.0477874 | 3.81875 | Nuclei up vs Whole cells |                          |
| NM_021541>Cryba2               | Cryba2        | NM_021541         | 0.0398934 | 3.79228 | Nuclei up vs Whole cells |                          |
| NM_177054>Casc4                | Casc4         | NM_177054         | 0.0456436 | 3.77095 | Nuclei up vs Whole cells |                          |
| NM_144803>Chrna2               | Chrna2        | NM_144803         | 0.0030460 | 6       | 3.74055                  | Nuclei up vs Whole cells |
| NM_001038607>Kcnh1             | Kcnh1         | NM_001038607      | 0.0022302 | 7       | 3.73567                  | Nuclei up vs Whole cells |
| NM_001163816>Vav1              | Vav1          | NM_001163816      | 0.0255311 | 6       | 3.72379                  | Nuclei up vs Whole cells |
| NM_001163386>4930579F01Rik     | 4930579F01Rik | NM_001163386      | 0.0467671 | 6       | 3.71744                  | Nuclei up vs Whole cells |
| NM_178877>Nhedc2               | Nhedc2        | NM_178877         | 0.0427693 | 7       | 3.70719                  | Nuclei up vs Whole cells |
| NM_178673>Fstl5                | Fstl5         | NM_178673         | 0.0303172 | 6       | 3.65906                  | Nuclei up vs Whole cells |
| NM_007873>Doc2b                | Doc2b         | NM_007873         | 0.045567  | 6       | 3.65746                  | Nuclei up vs Whole cells |
| NM_001085421>Tspyl5            | Tspyl5        | NM_001085421      | 0.0233135 | 1       | 3.65567                  | Nuclei up vs Whole cells |
| NM_183139>Pld6                 | Pld6          | NM_183139         | 0.0331996 | 6       | 3.65239                  | Nuclei up vs Whole cells |
| NM_001195097>3425401B19Rik     | 3425401B19Rik | NM_001195097      | 0.0183732 | 7       | 3.63956                  | Nuclei up vs Whole cells |
| NM_172444>Thsd4                | Thsd4         | NM_172444         | 0.0415086 | 6       | 3.63813                  | Nuclei up vs Whole cells |
| NM_177039>A530016L24Rik        | A530016L24Rik | NM_177039         | 0.0207886 | 6       | 3.63246                  | Nuclei up vs Whole cells |
| NM_001034859>Gm4841            | Gm4841        | NM_001034859      | 0.0157037 | 9       | 3.6149                   | Nuclei up vs Whole cells |
| NM_001159532>Tex21             | Tex21         | NM_001159532      | 0.0281809 | 2       | 3.59758                  | Nuclei up vs Whole cells |
| NM_017394>Slc7a10              | Slc7a10       | NM_017394         | 0.0300168 | 6       | 3.58777                  | Nuclei up vs Whole cells |
| NM_010054>Dlx2                 | Dlx2          | NM_010054         | 0.0231757 | 6       | 3.57968                  | Nuclei up vs Whole cells |
| NM_001033795>Zcchc16           | Zcchc16       | NM_001033795      | 0.0112874 | 5       | 3.56306                  | Nuclei up vs Whole cells |
| NM_008402>Itgav                | Itgav         | NM_008402         | 0.0279642 | 6       | 3.55822                  | Nuclei up vs Whole cells |
| NM_011998>Chst4                | Chst4         | NM_011998         | 0.0157403 | 6       | 3.55604                  | Nuclei up vs Whole cells |
| NM_025973>Pgc                  | Pgc           | NM_025973         | 0.0405279 | 6       | 3.54237                  | Nuclei up vs Whole cells |
| NM_010289>Gja10                | Gja10         | NM_010289         | 0.04527   | 6       | 3.53342                  | Nuclei up vs Whole cells |
| NM_001033304>5330417C22Rik     | 5330417C22Rik | NM_001033304      | 0.045189  | 4       | 3.51917                  | Nuclei up vs Whole cells |
| NM_001025067>Lrig2             | Lrig2         | NM_001025067      | 2.51E-05  | 7       | 3.51901                  | Nuclei up vs Whole cells |
| NM_001164787_dup1>Sprr2a2_dup1 | Sprr2a2_dup1  | NM_001164787_dup1 | 0.0025323 | 4       | 3.51301                  | Nuclei up vs Whole cells |
| NM_011468_dup1>Sprr2a1_dup1    | Sprr2a1_dup1  | NM_011468_dup1    | 0.0025323 | 4       | 3.51301                  | Nuclei up vs Whole cells |
| NM_172861>Slc7a14              | Slc7a14       | NM_172861         | 0.0004701 | 35      | 3.50659                  | Nuclei up vs Whole cells |
| NM_172564>Tns4                 | Tns4          | NM_172564         | 0.0283971 | 6       | 3.50137                  | Nuclei up vs Whole cells |
| NM_010683>Lamc1                | Lamc1         | NM_010683         | 0.0197939 | 6       | 3.49422                  | Nuclei up vs Whole cells |
| NM_023709>Capn9                | Capn9         | NM_023709         | 0.0236392 | 6       | 3.47254                  | Nuclei up vs Whole cells |

|                         |               |              |           |           |                          |                          |
|-------------------------|---------------|--------------|-----------|-----------|--------------------------|--------------------------|
| NM_153559>Qsox2         | Qsox2         | NM_153559    | 0.0200056 | 3.46793   | Nuclei up vs Whole cells |                          |
| NM_001161355>Timd2      | Timd2         | NM_001161355 | 5         | 0.0441534 | 3.4665                   | Nuclei up vs Whole cells |
| NM_001177579>Gm10471    | Gm10471       | NM_001177579 | 7         | 0.0091690 | 3.46323                  | Nuclei up vs Whole cells |
| NM_001174047>Cacna2d2   | Cacna2d2      | NM_001174047 | 5         | 0.0098975 | 3.46041                  | Nuclei up vs Whole cells |
| NM_001174048>Cacna2d2   | Cacna2d2      | NM_001174048 | 6         | 0.0098975 | 3.46041                  | Nuclei up vs Whole cells |
| NM_001174049>Cacna2d2   | Cacna2d2      | NM_001174049 | 6         | 0.0098975 | 3.46041                  | Nuclei up vs Whole cells |
| NM_001174050>Cacna2d2   | Cacna2d2      | NM_001174050 | 6         | 0.0098975 | 3.46041                  | Nuclei up vs Whole cells |
| NM_020263>Cacna2d2      | Cacna2d2      | NM_020263    | 6         | 0.0098975 | 3.46041                  | Nuclei up vs Whole cells |
| NM_001126322>Gm11595    | Gm11595       | NM_001126322 | 2         | 0.0495075 | 3.45743                  | Nuclei up vs Whole cells |
| NM_146028>Stac2         | Stac2         | NM_146028    | 26        | 0.0002778 | 3.454                    | Nuclei up vs Whole cells |
| NR_024257>4930412O13Rik | 4930412O13Rik | NR_024257    | 0.0312299 | 0.0003186 | 3.45286                  | Nuclei up vs Whole cells |
| NM_015826>Dmrt1         | Dmrt1         | NM_015826    | 59        | 0.0003186 | 3.4375                   | Nuclei up vs Whole cells |
| NR_027858>Nlrp1c-ps     | Nlrp1c-ps     | NR_027858    | 0.0289108 | 0.0015560 | 3.396                    | Nuclei up vs Whole cells |
| NM_001004150>A4galt     | A4galt        | NM_001004150 | 6         | 0.0015560 | 3.39192                  | Nuclei up vs Whole cells |
| NM_177086>Zmat4         | Zmat4         | NM_177086    | 0.0364836 | 0.0023219 | 3.39062                  | Nuclei up vs Whole cells |
| NM_145136>Myocd         | Myocd         | NM_145136    | 0.0477561 | 0.0023219 | 3.3874                   | Nuclei up vs Whole cells |
| NM_172521>Nut           | Nut           | NM_172521    | 9         | 0.0023219 | 3.38407                  | Nuclei up vs Whole cells |
| NM_009421>Traf1         | Traf1         | NM_009421    | 0.0459212 | 0.013378  | 3.37438                  | Nuclei up vs Whole cells |
| NR_015593>D130009I18Rik | D130009I18Rik | NR_015593    | 0.013378  | 0.0361866 | 3.35635                  | Nuclei up vs Whole cells |
| NM_010456>Hoxa9         | Hoxa9         | NM_010456    | 0.0361866 | 0.0051404 | 3.34416                  | Nuclei up vs Whole cells |
| NM_001024727>Gm16387    | Gm16387       | NM_001024727 | 8         | 0.0051404 | 3.33949                  | Nuclei up vs Whole cells |
| NM_173385>Cilp          | Cilp          | NM_173385    | 0.017037  | 0.0393128 | 3.33086                  | Nuclei up vs Whole cells |
| NM_027937>Caskin1       | Caskin1       | NM_027937    | 0.0393128 | 0.0229346 | 3.33072                  | Nuclei up vs Whole cells |
| NM_001167832>Zfp764     | Zfp764        | NM_001167832 | 2         | 0.0229346 | 3.31341                  | Nuclei up vs Whole cells |
| NM_146203>Zfp764        | Zfp764        | NM_146203    | 0.0229347 | 0.0257805 | 3.31341                  | Nuclei up vs Whole cells |
| NM_001102563>Prرت2      | Prرت2         | NM_001102563 | 3         | 0.0257805 | 3.30376                  | Nuclei up vs Whole cells |
| NM_001079932>Trim72     | Trim72        | NM_001079932 | 2         | 0.0145404 | 3.30254                  | Nuclei up vs Whole cells |
| NM_001127177>Ptpn2      | Ptpn2         | NM_001127177 | 5         | 0.0010972 | 3.30097                  | Nuclei up vs Whole cells |
| NM_172486>Zfp677        | Zfp677        | NM_172486    | 0.0259954 | 0.0492297 | 3.29973                  | Nuclei up vs Whole cells |
| NM_018873>Srcin1        | Srcin1        | NM_018873    | 0.0492297 | 0.0147257 | 3.29457                  | Nuclei up vs Whole cells |
| NM_145592>Dkk4          | Dkk4          | NM_145592    | 0.0147257 | 0.0051632 | 3.29406                  | Nuclei up vs Whole cells |
| NR_027651>Meg3          | Meg3          | NR_027651    | 2         | 0.0051632 | 3.29376                  | Nuclei up vs Whole cells |
| NM_001145978>Parp4      | Parp4         | NM_001145978 | 8         | 0.0400015 | 3.28839                  | Nuclei up vs Whole cells |
| NM_206958>Ltbp1         | Ltbp1         | NM_206958    | 0.0375915 | 0.0003909 | 3.287                    | Nuclei up vs Whole cells |
| NM_133690>Atp1b4        | Atp1b4        | NM_133690    | 55        | 0.0003909 | 3.27338                  | Nuclei up vs Whole cells |

|                            |               |              |                        |                        |                          |                          |
|----------------------------|---------------|--------------|------------------------|------------------------|--------------------------|--------------------------|
| NM_207298>Cercam           | Cercam        | NM_207298    | 0.0409793              | 3.27037                | Nuclei up vs Whole cells |                          |
| NR_033491>Gm10466          | Gm10466       | NR_033491    | 0.0114894<br>0.0029917 | 3.26599                | Nuclei up vs Whole cells |                          |
| NM_009675>Aoc3             | Aoc3          | NM_009675    | 8                      | 3.2616                 | Nuclei up vs Whole cells |                          |
| NM_133191>Eps8l2           | Eps8l2        | NM_133191    | 0.031332               | 3.25486                | Nuclei up vs Whole cells |                          |
| NM_001145927>C530028O21Rik | C530028O21Rik | NM_001145927 | 7                      | 3.2539                 | Nuclei up vs Whole cells |                          |
| NM_001104638>Vmn2r23       | Vmn2r23       | NM_001104638 | 8                      | 0.0266353              | 3.24864                  | Nuclei up vs Whole cells |
| NM_007735>Col4a4           | Col4a4        | NM_007735    | 0.0244636              | 3.24057                | Nuclei up vs Whole cells |                          |
| NM_001164724>Il33          | Il33          | NM_001164724 | 4                      | 0.0412384<br>0.0099244 | 3.23711                  | Nuclei up vs Whole cells |
| NM_178685>Pcdh20           | Pcdh20        | NM_178685    | 9                      | 3.23413                | Nuclei up vs Whole cells |                          |
| NM_012045>Pla2g2f          | Pla2g2f       | NM_012045    | 0.0178663<br>0.0077211 | 3.22653                | Nuclei up vs Whole cells |                          |
| NM_010466>Hoxc8            | Hoxc8         | NM_010466    | 6                      | 3.22101                | Nuclei up vs Whole cells |                          |
| NM_029698>Ttc18            | Ttc18         | NM_029698    | 0.0148221              | 3.21102                | Nuclei up vs Whole cells |                          |
| NM_001195672>Gm221         | Gm221         | NM_001195672 | 2                      | 0.0318773<br>0.0006845 | 3.2038                   | Nuclei up vs Whole cells |
| NM_138750>Prom2            | Prom2         | NM_138750    | 77                     | 0.0006845              | 3.2014                   | Nuclei up vs Whole cells |
| NM_178047>Prom2            | Prom2         | NM_178047    | 78                     | 3.2014                 | Nuclei up vs Whole cells |                          |
| NM_001037859>Csf1r         | Csf1r         | NM_001037859 | 1                      | 0.0018689              | 3.19546                  | Nuclei up vs Whole cells |
| NM_011204>Ptpn13           | Ptpn13        | NM_011204    | 0.0229828              | 3.19187                | Nuclei up vs Whole cells |                          |
| NM_001110240>Slc24a2       | Slc24a2       | NM_001110240 | 0                      | 0.0223882              | 3.17858                  | Nuclei up vs Whole cells |
| NM_011859>Osr1             | Osr1          | NM_011859    | 0.0228279              | 3.16607                | Nuclei up vs Whole cells |                          |
| NR_030692>A930011G23Rik    | A930011G23Rik | NR_030692    | 0.0155406              | 3.1649                 | Nuclei up vs Whole cells |                          |
| NM_177278>L3mbtl4          | L3mbtl4       | NM_177278    | 0.0042952              | 3.13005                | Nuclei up vs Whole cells |                          |
| NM_172485>Thsd7b           | Thsd7b        | NM_172485    | 0.0236392              | 3.12015                | Nuclei up vs Whole cells |                          |
| NM_153508>Clstn3           | Clstn3        | NM_153508    | 0.011319               | 3.11808                | Nuclei up vs Whole cells |                          |
| NM_028085>Anks4b           | Anks4b        | NM_028085    | 0.0199275              | 3.10689                | Nuclei up vs Whole cells |                          |
| NM_173734>Tmem87a          | Tmem87a       | NM_173734    | 0.0307979<br>0.0016796 | 3.09705                | Nuclei up vs Whole cells |                          |
| NM_007739>Col8a1           | Col8a1        | NM_007739    | 2                      | 3.08325                | Nuclei up vs Whole cells |                          |
| NM_001146268>Pdgfrb        | Pdgfrb        | NM_001146268 | 8                      | 0.0001282<br>59        | 3.05599                  | Nuclei up vs Whole cells |
| NM_008809>Pdgfrb           | Pdgfrb        | NM_008809    | 61                     | 3.05599                | Nuclei up vs Whole cells |                          |
| NM_001113393>Cd247         | Cd247         | NM_001113393 | 3                      | 0.0031634<br>7         | 3.03565                  | Nuclei up vs Whole cells |
| NM_001113394>Cd247         | Cd247         | NM_001113394 | 4                      | 0.0031634<br>7         | 3.03565                  | Nuclei up vs Whole cells |
| NM_001085540>Pramef17      | Pramef17      | NM_001085540 | 0                      | 0.0353828              | 3.03166                  | Nuclei up vs Whole cells |
| NM_019969>Plag1            | Plag1         | NM_019969    | 0.0108907              | 3.0285                 | Nuclei up vs Whole cells |                          |
| NM_011772>Ikzf4            | Ikzf4         | NM_011772    | 0.0274504              | 3.02639                | Nuclei up vs Whole cells |                          |
| NM_009707>Arhgap6          | Arhgap6       | NM_009707    | 0.0356864              | 3.01173                | Nuclei up vs Whole cells |                          |



p6

|                                |               |                   |           |          |                            |                            |
|--------------------------------|---------------|-------------------|-----------|----------|----------------------------|----------------------------|
| NM_001039149>Cd226             | Cd226         | NM_001039149      | 0.0488657 | 3.00708  | Nuclei up vs Whole cells   |                            |
| NM_010074>Dpp4                 | Dpp4          | NM_010074         | 0.0408543 | 3.00059  | Nuclei up vs Whole cells   |                            |
| NM_016766>Mcrs1                | Mcrs1         | NM_016766         | 0.001993  | -3.1206  | Nuclei down vs Whole cells |                            |
| NM_134002>Csnk1g2              | Csnk1g2       | NM_134002         | 0.0199871 | -3.12415 | Nuclei down vs Whole cells |                            |
| NM_001033819>9130409I23Rik     | 9130409I23Rik | NM_001033819      | 0.010026  | -3.29095 | Nuclei down vs Whole cells |                            |
| NM_001099349_dup3>Gm14308_dup3 | Gm14308_dup3  | NM_001099349_dup3 | 0.0197868 | -3.29889 | Nuclei down vs Whole cells |                            |
| NM_010758>Mag                  | Mag           | NM_010758         | 0.0411256 | -3.3354  | Nuclei down vs Whole cells |                            |
| NR_033220>BC039771             | BC039771      | NR_033220         | 0.0269799 | -3.3733  | Nuclei down vs Whole cells |                            |
| NR_003639>1700013N18Rik        | 1700013N18Rik | NR_003639         | 0.0001021 | 33       | -3.47506                   | Nuclei down vs Whole cells |
| NM_001039391>Pki               | Pki           | NM_001039391      | 0.0453363 | -3.51501 | Nuclei down vs Whole cells |                            |
| NM_001042725>Calcr             | Calcr         | NM_001042725      | 0.0480252 | -3.58088 | Nuclei down vs Whole cells |                            |
| NM_007588>Calcr                | Calcr         | NM_007588         | 0.0480252 | -3.58088 | Nuclei down vs Whole cells |                            |
| NM_177887>Tmem150b             | Tmem150b      | NM_177887         | 0.0279536 | -3.6307  | Nuclei down vs Whole cells |                            |
| NM_001177406_dup3>Gm14431_dup3 | Gm14431_dup3  | NM_001177406_dup3 | 0.0101731 | -3.65331 | Nuclei down vs Whole cells |                            |
| NM_001177407_dup3>Gm8898_dup3  | Gm8898_dup3   | NM_001177407_dup3 | 0.0101731 | -3.65331 | Nuclei down vs Whole cells |                            |
| NM_175249>Psap1                | Psap1         | NM_175249         | 0.0257171 | -3.699   | Nuclei down vs Whole cells |                            |
| NR_033550>Gm10248              | Gm10248       | NR_033550         | 0.0192265 | -3.77634 | Nuclei down vs Whole cells |                            |
| NM_177382>Cyp2r1               | Cyp2r1        | NM_177382         | 0.0448083 | -3.92774 | Nuclei down vs Whole cells |                            |
| NM_033268>Actn2                | Actn2         | NM_033268         | 0.0457634 | -4.00766 | Nuclei down vs Whole cells |                            |
| NM_175519>Kctd8                | Kctd8         | NM_175519         | 0.0186554 | -4.02592 | Nuclei down vs Whole cells |                            |
| NM_172923>AI118078             | AI118078      | NM_172923         | 0.0449712 | -4.29708 | Nuclei down vs Whole cells |                            |
| NM_178203>Hist1h3b             | Hist1h3b      | NM_178203         | 0.0424376 | -4.46837 | Nuclei down vs Whole cells |                            |
| NM_001126489>Zfp735            | Zfp735        | NM_001126489      | 0.0489386 | -4.85045 | Nuclei down vs Whole cells |                            |
| NM_030703>Cpn1                 | Cpn1          | NM_030703         | 0.0256042 | -5.01338 | Nuclei down vs Whole cells |                            |
| NM_031867>Tas1r1               | Tas1r1        | NM_031867         | 0.0012564 | 8        | -5.03614                   | Nuclei down vs Whole cells |
| NM_001001327>Vkorc1l1          | Vkorc1l1      | NM_001001327      | 0.0063632 | 4        | -5.11608                   | Nuclei down vs Whole cells |
| NR_015488>A930003A15Rik        | A930003A15Rik | NR_015488         | 0.0482706 | -5.22585 | Nuclei down vs Whole cells |                            |
| NM_001134660>Prr23a            | Prr23a        | NM_001134660      | 0.0289154 | 0        | -5.30456                   | Nuclei down vs Whole cells |
| NR_033121_dup2>Gm8348_dup2     | Gm8348_dup2   | NR_033121_dup2    | 0.0410417 | p2       | -5.37492                   | Nuclei down vs Whole cells |
| NM_001145806>Capn8             | Capn8         | NM_001145806      | 0.0369749 | 6        | -5.60523                   | Nuclei down vs Whole cells |
| NM_027650>Speer3               | Speer3        | NM_027650         | 0.0114941 | -5.64153 | Nuclei down vs Whole cells |                            |
| NM_183158>Cyp2ab1              | Cyp2ab1       | NM_183158         | 0.0021255 | 9        | -5.65339                   | Nuclei down vs Whole cells |
| NM_029946>Efcab6               | Efcab6        | NM_029946         | 0.0243017 | -5.75752 | Nuclei down vs Whole cells |                            |
| NM_009611>Actl7a               | Actl7a        | NM_009611         | 0.0476764 | -5.82649 | Nuclei down vs Whole cells |                            |

|                                |               |                   |           |           |                            |                            |
|--------------------------------|---------------|-------------------|-----------|-----------|----------------------------|----------------------------|
| NM_033601>Bcl3                 | Bcl3          | NM_033601         | 0.0244082 | -5.89593  | Nuclei down vs Whole cells |                            |
| NM_001085534>Gm5938            | Gm5938        | NM_001085534      | 4         | 0.047917  | -5.92387                   | Nuclei down vs Whole cells |
| NM_198419>Phactr1              | Phactr1       | NM_198419         | 0.0347575 | -5.99857  | Nuclei down vs Whole cells |                            |
| NM_008039>Fpr2                 | Fpr2          | NM_008039         | 8         | 0.0032057 | -6.39629                   | Nuclei down vs Whole cells |
| NM_134170>Vmn1r32              | Vmn1r32       | NM_134170         | 0.0367088 | -6.41742  | Nuclei down vs Whole cells |                            |
| NM_144821>Al317395             | Al317395      | NM_144821         | 0.0241932 | -6.81518  | Nuclei down vs Whole cells |                            |
| NM_021325>Cd200r1              | Cd200r1       | NM_021325         | 0.0304908 | -7.00704  | Nuclei down vs Whole cells |                            |
| NM_025769>Efcab1               | Efcab1        | NM_025769         | 0.0222441 | -7.33025  | Nuclei down vs Whole cells |                            |
| NM_001166627_dup4>Dynlt1f_dup4 | Dynlt1f_dup4  | NM_001166627_dup4 | 3         | 0.0043429 | -7.34359                   | Nuclei down vs Whole cells |
| NM_013486>Cd2                  | Cd2           | NM_013486         | 0.0459818 | -7.36452  | Nuclei down vs Whole cells |                            |
| NM_175525>D630042P16Rik        | D630042P16Rik | NM_175525         | 0.0348087 | -7.85203  | Nuclei down vs Whole cells |                            |
| NM_020503>Tas2r119             | Tas2r119      | NM_020503         | 0.0443585 | -7.95372  | Nuclei down vs Whole cells |                            |
| NM_133193>Il1r2                | Il1r2         | NM_133193         | 9         | 0.0082720 | -8.04354                   | Nuclei down vs Whole cells |
| NM_001104547>Vmn2r96           | Vmn2r96       | NM_001104547      | 7         | 0.0421371 | -8.44227                   | Nuclei down vs Whole cells |
| NM_001034101>Gm13119           | Gm13119       | NM_001034101      | 1         | 0.0379931 | -8.48303                   | Nuclei down vs Whole cells |
| NM_001048196>Krtap4-1          | Krtap4-1      | NM_001048196      | 6         | 0.0478059 | -8.68869                   | Nuclei down vs Whole cells |
| NM_001039653>Lhx3              | Lhx3          | NM_001039653      | 3         | 0.0002944 | -8.78365                   | Nuclei down vs Whole cells |
| NM_023729>Asz1                 | Asz1          | NM_023729         | 8         | 0.0085755 | -8.93075                   | Nuclei down vs Whole cells |
| NM_013596>Mc5r                 | Mc5r          | NM_013596         | 0.0489222 | -9.19794  | Nuclei down vs Whole cells |                            |
| NM_021483>Pex5l                | Pex5l         | NM_021483         | 0.0214987 | -9.21198  | Nuclei down vs Whole cells |                            |
| NM_007967>Evx2                 | Evx2          | NM_007967         | 0.0402564 | -9.70061  | Nuclei down vs Whole cells |                            |
| NM_001018087>Ldoc1             | Ldoc1         | NM_001018087      | 7         | 0.0212415 | -9.98858                   | Nuclei down vs Whole cells |
| NM_153096>Zfp353               | Zfp353        | NM_153096         | 0.0227177 | -10.0516  | Nuclei down vs Whole cells |                            |
| NM_146783>Olfr26               | Olfr26        | NM_146783         | 0.0441297 | -10.1988  | Nuclei down vs Whole cells |                            |
| NM_177923>H2-M10.2             | H2-M10.2      | NM_177923         | 0.0284159 | -10.4289  | Nuclei down vs Whole cells |                            |
| NM_009317>Tal2                 | Tal2          | NM_009317         | 0.0087421 | -10.626   | Nuclei down vs Whole cells |                            |
| NM_001111059>Cd34              | Cd34          | NM_001111059      | 9         | 0.0269535 | -10.7477                   | Nuclei down vs Whole cells |
| NM_029067>Spata17              | Spata17       | NM_029067         | 0.0444364 | -10.9112  | Nuclei down vs Whole cells |                            |
| NM_001081283>Tmem28            | Tmem28        | NM_001081283      | 3         | 0.0362378 | -10.9293                   | Nuclei down vs Whole cells |
| NM_001003951>Ces5a             | Ces5a         | NM_001003951      | 1         | 0.0340595 | -12.4363                   | Nuclei down vs Whole cells |
| NM_178215>Hist2h3b             | Hist2h3b      | NM_178215         | 3         | 0.0022924 | -12.5105                   | Nuclei down vs Whole cells |
| NM_199225>Cd300c               | Cd300c        | NM_199225         | 0.0257218 | -12.7242  | Nuclei down vs Whole cells |                            |
| NM_026593>D730048I06Rik        | D730048I06Rik | NM_026593         | 0.04276   | -12.902   | Nuclei down vs Whole cells |                            |
| NM_018866>Cxcl13               | Cxcl13        | NM_018866         | 0.046067  | -13.1631  | Nuclei down vs Whole cells |                            |
| NM_013542>Gzmb                 | Gzmb          | NM_013542         | 0.0180082 | -13.229   | Nuclei down vs Whole cells |                            |

|                           |          |                  |           |   |          |                            |
|---------------------------|----------|------------------|-----------|---|----------|----------------------------|
| NM_009654>Alb             | Alb      | NM_009654        | 0.0046630 | 5 | -14.7251 | Nuclei down vs Whole cells |
| NM_001011759>Olf<br>r1031 | Olfr1031 | NM_00101175<br>9 | 0.0050020 | 8 | -16.4963 | Nuclei down vs Whole cells |
| NM_134201>Vmn1r<br>236    | Vmn1r236 | NM_134201        | 1.96E-05  |   | -17.5803 | Nuclei down vs Whole cells |
| NM_001159617>Pig<br>p     | Pigp     | NM_00115961<br>7 | 0.0264643 |   | -17.9118 | Nuclei down vs Whole cells |
| NM_010662>Krt13           | Krt13    | NM_010662        | 0.0127378 |   | -22.7554 | Nuclei down vs Whole cells |
| NR_030705>Snord2          | Snord2   | NR_030705        | 0.0438372 |   | -24.8022 | Nuclei down vs Whole cells |
| NM_001161769>Lm<br>o4     | Lmo4     | NM_00116176<br>9 | 0.0010660 | 7 | -25.1349 | Nuclei down vs Whole cells |

**Table S5.** Gene ontology results of genes enriched in nuclei as compared to cells.

## Biological Processes

| Category      | Term                                                                                                    | Count | %           | PValue      |
|---------------|---------------------------------------------------------------------------------------------------------|-------|-------------|-------------|
| GOTERM_BP_FAT | GO:0006355~regulation of transcription, DNA-dependent                                                   | 32    | 10.03134796 | 0.015191102 |
| GOTERM_BP_FAT | GO:0051252~regulation of RNA metabolic process                                                          | 32    | 10.03134796 | 0.018575851 |
| GOTERM_BP_FAT | GO:0007155~cell adhesion                                                                                | 22    | 6.896551724 | 4.86E-05    |
| GOTERM_BP_FAT | GO:0022610~biological adhesion                                                                          | 22    | 6.896551724 | 4.99E-05    |
| GOTERM_BP_FAT | GO:0006811~ion transport                                                                                | 19    | 5.956112853 | 0.012737724 |
| GOTERM_BP_FAT | GO:0010557~positive regulation of macromolecule biosynthetic process                                    | 18    | 5.642633229 | 0.001476793 |
| GOTERM_BP_FAT | GO:0031328~positive regulation of cellular biosynthetic process                                         | 18    | 5.642633229 | 0.002268093 |
| GOTERM_BP_FAT | GO:0009891~positive regulation of biosynthetic process                                                  | 18    | 5.642633229 | 0.002490561 |
| GOTERM_BP_FAT | GO:0010604~positive regulation of macromolecule metabolic process                                       | 18    | 5.642633229 | 0.008807094 |
| GOTERM_BP_FAT | GO:0045941~positive regulation of transcription                                                         | 16    | 5.015673981 | 0.003229158 |
| GOTERM_BP_FAT | GO:0010628~positive regulation of gene expression                                                       | 16    | 5.015673981 | 0.004148375 |
| GOTERM_BP_FAT | GO:0045935~positive regulation of nucleobase, nucleoside, nucleotide and nucleic acid metabolic process | 16    | 5.015673981 | 0.00618514  |
| GOTERM_BP_FAT | GO:0051173~positive regulation of nitrogen compound metabolic process                                   | 16    | 5.015673981 | 0.008122409 |
| GOTERM_BP_FAT | GO:0045893~positive regulation of transcription, DNA-dependent                                          | 15    | 4.702194357 | 0.002490023 |
| GOTERM_BP_FAT | GO:0051254~positive regulation of RNA metabolic process                                                 | 15    | 4.702194357 | 0.002657817 |

|               |                                                 |    |             |             |
|---------------|-------------------------------------------------|----|-------------|-------------|
|               | GO:0006357~regulation of transcription from RNA |    |             |             |
| GOTERM_BP_FAT | polymerase II promoter                          | 15 | 4.702194357 | 0.056220821 |
| GOTERM_BP_FAT | GO:0006812~cation transport                     | 14 | 4.388714734 | 0.032321934 |
|               | GO:0045944~positive regulation of transcription |    |             |             |
| GOTERM_BP_FAT | from RNA polymerase II promoter                 | 13 | 4.07523511  | 0.005151355 |
| GOTERM_BP_FAT | GO:0030001~metal ion transport                  | 13 | 4.07523511  | 0.024062749 |
| GOTERM_BP_FAT | GO:0042127~regulation of cell proliferation     | 13 | 4.07523511  | 0.082085763 |
|               | GO:0051094~positive regulation of developmental |    |             |             |
| GOTERM_BP_FAT | process                                         | 11 | 3.448275862 | 9.72E-04    |
|               | GO:0007167~enzyme linked receptor protein       |    |             |             |
| GOTERM_BP_FAT | signaling pathway                               | 11 | 3.448275862 | 0.005736057 |
|               | GO:0045597~positive regulation of cell          |    |             |             |
| GOTERM_BP_FAT | differentiation                                 | 10 | 3.134796238 | 8.88E-04    |
| GOTERM_BP_FAT | GO:0048568~embryonic organ development          | 10 | 3.134796238 | 0.007593387 |

**Table S6.** Categories and numbers of noncoding RNAs identified in nuclei and whole cell sample.

| category                   | antisense | lincRNA | miRNA | misc RNA | noncoding | processed transcript | retained intron | snRNA | snoRNA | total      |
|----------------------------|-----------|---------|-------|----------|-----------|----------------------|-----------------|-------|--------|------------|
| <b>*All Nuclei</b>         | 3         | 146     | 86    | 5        | 2         | 76                   | 10              | 1     | 64     | <b>393</b> |
| <b>Nuclei Average</b>      | 3         | 138     | 51    | 4        | 2         | 71                   | 10              | 1     | 43     | <b>323</b> |
| <b>N10 group</b>           | 3         | 135     | 47    | 4        | 2         | 71                   | 9               | 1     | 44     | <b>316</b> |
| <b>N100 group</b>          | 2         | 120     | 30    | 0        | 2         | 65                   | 8               | 0     | 28     | <b>255</b> |
| <b>N1-1</b>                | 2         | 122     | 34    | 3        | 2         | 67                   | 8               | 1     | 23     | <b>262</b> |
| <b>N1-2</b>                | 3         | 130     | 27    | 2        | 2         | 68                   | 9               | 1     | 20     | <b>262</b> |
| <b>N1-3</b>                | 2         | 86      | 17    | 1        | 2         | 51                   | 6               | 0     | 20     | <b>185</b> |
| <b>N10-1</b>               | 2         | 111     | 24    | 1        | 2         | 58                   | 7               | 1     | 19     | <b>225</b> |
| <b>N10-2</b>               | 1         | 105     | 20    | 0        | 2         | 58                   | 6               | 1     | 22     | <b>215</b> |
| <b>N10-3</b>               | 2         | 122     | 24    | 3        | 2         | 67                   | 8               | 0     | 31     | <b>259</b> |
| <b>N100-1</b>              | 1         | 88      | 20    | 0        | 2         | 52                   | 6               | 0     | 19     | <b>188</b> |
| <b>N100-2</b>              | 2         | 96      | 13    | 0        | 2         | 53                   | 8               | 0     | 15     | <b>189</b> |
| <b>N100-3</b>              | 1         | 76      | 11    | 0        | 1         | 43                   | 5               | 0     | 16     | <b>153</b> |
| <b>*All Whole Cells</b>    | 3         | 147     | 103   | 2        | 2         | 77                   | 10              | 2     | 71     | <b>417</b> |
| <b>Whole Cells Average</b> | 2         | 138     | 48    | 1        | 2         | 72                   | 8               | 1     | 27     | <b>299</b> |
| <b>C10 group</b>           | 3         | 133     | 31    | 1        | 2         | 71                   | 9               | 1     | 45     | <b>296</b> |
| <b>C100 group</b>          | 3         | 138     | 56    | 2        | 2         | 74                   | 10              | 1     | 62     | <b>348</b> |
| <b>C1A</b>                 | 2         | 118     | 24    | 0        | 2         | 61                   | 6               | 1     | 18     | <b>232</b> |
| <b>C1B</b>                 | 2         | 118     | 24    | 1        | 2         | 64                   | 6               | 1     | 10     | <b>228</b> |
| <b>C1C</b>                 | 2         | 101     | 15    | 0        | 2         | 55                   | 6               | 0     | 15     | <b>196</b> |
| <b>C10A</b>                | 2         | 109     | 19    | 1        | 2         | 58                   | 6               | 0     | 20     | <b>217</b> |
| <b>C10B</b>                | 2         | 119     | 13    | 0        | 2         | 66                   | 8               | 0     | 20     | <b>230</b> |
| <b>C10C</b>                | 2         | 98      | 14    | 0        | 2         | 55                   | 6               | 1     | 28     | <b>206</b> |
| <b>C100A</b>               | 3         | 119     | 24    | 0        | 2         | 65                   | 8               | 0     | 34     | <b>255</b> |
| <b>C100B</b>               | 1         | 107     | 22    | 1        | 2         | 62                   | 7               | 0     | 35     | <b>237</b> |
| <b>C100C</b>               | 3         | 129     | 39    | 2        | 2         | 67                   | 10              | 1     | 49     | <b>302</b> |
| <b>DG group</b>            | 1         | 120     | 22    | 1        | 2         | 62                   | 6               | 1     | 11     | <b>226</b> |
| <b>DG 1-1</b>              | 1         | 113     | 19    | 0        | 2         | 59                   | 4               | 1     | 7      | <b>206</b> |
| <b>DG 1-2</b>              | 0         | 100     | 13    | 1        | 2         | 50                   | 6               | 0     | 8      | <b>180</b> |
| <b>fetal stromal bulk</b>  | 1         | 115     | 20    | 3        | 2         | 62                   | 8               | 1     | 17     | <b>229</b> |

\* = values represent non-redundant union of all 3 groups (n1,n10,n100 or c1,c10,c100).

group = values represent non-redundant union of 3 replicates within each of 3 groups of nuclei or cells (eg: N1-1,N1-2, N1-3, etc.).

Or 2 replicates in case of DG nuclei

antisense: transcripts overlapping the genomic extent of one or more coding loci on the opposite strand

lincRNA: long intergenic non-coding RNA. Transcripts do not overlap protein-coding locus on same or opposite strand.

miRNA: microRNA precursors

misc RNA: miscellaneous other RNA

noncoding: known transcripts with non-coding function confirmed by literature or experiments

processed transcript: does not contain an open reading frame (ORF) which can be unambiguously assigned as a CDS

retained intron: has retained intronic sequence compared to a reference variant

snRNA: small nuclear RNA

snoRNA: small nucleolar RNA

## **Methods**

### ***S1 Micromanipulation of single cells and nuclei***

Following isolation of NP cells and purification of nuclei, each sample was diluted to 1,000 objects (cells, nuclei) per microliter with cold phosphate buffered saline (PBS) (ultrapure-grade phosphate buffers and saline solutions, 1X concentration is 137 mM NaCl, 2.7 mM KCl, 8 mM Na<sub>2</sub>HPO<sub>4</sub> and 2 mM KH<sub>2</sub>PO<sub>4</sub> (Ambion)). An aliquot (50 µl) of the diluted sample was transferred onto a cold glass slide and viewed with an IX70 Olympus microscope under phase contrast and fluorescence illumination. Cells or nuclei were individually aspirated using a glass micropipette having a 15 µm inner diameter (Eppendorf) connected to a CellTram® Oil Transferman® (Eppendorf), and serially expelled and washed three times in cold, nuclease free PBS. The individual cell or nucleus was then expelled from the micropipette into a 0.2 ml thin-walled PCR tube containing a droplet (1.0 µl) of cold lysis buffer solution. Each sample was immediately either lysed for cDNA synthesis or flash-frozen in liquid nitrogen and stored at -80° C.

### ***S2 cDNA synthesis, amplification and TaqMan analysis***

cDNA synthesis and PCR amplification was done according to previous methods (2, 3). Briefly, samples were lysed with heat, and mRNA was reverse-transcribed using a poly(dT) primer. First strand cDNA was polyadenylated with terminal transferase and second-strand cDNA synthesis was done with a second poly(dT) primer. Double stranded cDNA was amplified, limiting the rounds of PCR to preserve relative expression levels. The products of the first round of PCR (18 cycles for the NPCs and 22 cycles for the DGs) were then screened for genes of interest by qPCR.

TaqMan loci (Applied Biosystems) qPCR employed a 1:10 dilution of the first round PCR products. An aliquot (0.5 µl) of TaqMan gene expression assay mixed with 5.0 µl of 1x PerfeCTa™ qPCR FastMix™ (Quanta Biosciences) and brought to a final volume of 10 µl with nuclease-free water

(Ambion). Real-time thermal cycling conditions were: 95°C for 2 minutes, followed by 50 cycles of 95°C for 10 seconds and 60°C for 30 seconds.

### ***S3 SOLiD sequencing, mapping, and error correction***

Fragment libraries were constructed following published protocols for the SOLiD platform (3). In a single-end, 50 base pair read run, multiplexed samples were sequenced on each of two slides. The SOLiD Accuracy Enhancement Tool (SAET) and the transcriptome pipelines in the Bioscope™ Software were used for error correction and high accuracy mapping against the *Mus musculus* genome assembly MGSCv37 (mm9) to which the EYFP transgene transcript sequence was added. The DG nuclei and stromal control were sequenced later with improved protocols (for example in library production and increased bead density on the sequencing plate), which can account for the increase in mapping efficiency (SI Appendix, Table S2).

### ***S4 Bioinformatics analysis***

Gene expression was quantified using RPKM values (4). Variance was stabilized by  $\log_2$  scaling. Data post-processing and graphics production was done using Matlab functions developed in-house. Hierarchical clustering of gene expression and samples was performed with one minus correlation metric and the unweighted average distance (UPGMA; also known as group average) linkage method (5).

Variation of the replicates of each type of sample was quantified using the coefficient of variation (CV): first, for each group of samples corresponding to the same biological entity, the variation of each gene was calculated as the CV of its  $\log_2$  RPKM expression across all the replicates of the group. Second, the variation of all the genes of the group was summarized using the mean values. Thus, the variation in a group is defined as the mean  $\mu(\text{CV})$  of the coefficient of variation of each gene expression across all the replicates.



## **S5 Gene ontology analysis**

Transcripts enriched in the nuclei were calculated using one-way ANOVA with a  $P$ -value  $\leq$  0.05. The list of 352 transcripts (SI Appendix, Table S4) was submitted for functional analysis to the Database for Annotation, Visualization and Integrated Discovery (DAVID; (6)) to identify categories that were overrepresented. The functional annotations were retrieved, and a threshold of a minimum of ten genes per category was set.

## **References**

1. Bergsland M, *et al.* (2011) Sequentially acting Sox transcription factors in neural lineage development. *Genes Dev* 25(23):2453-2464.
2. Tang F, *et al.* (2009) mRNA-Seq whole-transcriptome analysis of a single cell. *Nat. Methods* 6(5):377-382.
3. Tang F, *et al.* (2010) RNA-Seq analysis to capture the transcriptome landscape of a single cell. *Nat. Protoc.* 5(3):516-535.
4. Mortazavi A, Williams BA, McCue K, Schaeffer L, & Wold B (2008) Mapping and quantifying mammalian transcriptomes by RNA-Seq. *Nat. Methods* 5(7):621-628.
5. Sokal R & Michener C (1958) A statistical method for evaluating systematic relationships. *Univ. Kans. Sci. Bull.* 38:1409-1438.
6. Huang da W, Sherman BT, & Lempicki RA (2009) Systematic and integrative analysis of large gene lists using DAVID bioinformatics resources. *Nat. Protoc.* 4(1):44-57.
